# Supplementary material for: The Structure of Psychiatric Science
Source: Atypon-hosted journal article supplement (doi:10.1176/appi.ajp.2014.13111539), 2014-05-16
Supplement: 931_ds001.pdf [file 931_ds001.pdf]

Data Supplement for Kendler, The Structure of Psychiatric Science. Am J Psychiatry (doi: 10.1176/appi.ajp.2014.13111539)

## **Contents**

[Appendix 1: Journals covered in the literature review](#)

[Appendix 2: Summaries of studies and bibliography](#)

[Appendix 3: Examples of potential problems with incommensurability](#)

## Appendix 1

The 12 journals covered in the literature review are listed below. I did not include studies that examined treatment or predicted the clinical features or outcome of individuals who were already ill. I focused on the main finding in each article and identified the key predictor variables and the dependent measure. I did not attempt to verify that a strong causal case could be made for the predictor variables.

*Acta Psychiatrica Scandinavica*

*American Journal of Psychiatry*

*Biological Psychiatry*

*British Journal of Psychiatry*

*JAMA Psychiatry*

*Journal of Nervous and Mental Disease*

*Journal of Abnormal Psychology*

*Journal of Affective Disorders*

*Molecular Psychiatry*

*Psychological Medicine*

*Schizophrenia Bulletin*

*Social Psychiatry and Psychiatric Epidemiology*

## Appendix 2

### Summaries of Studies Examining the Etiology of Psychiatric Illness or Key Psychiatric Traits That Appeared in the First Four 2013 Issues of Twelve Representative Psychiatric and Psychology Journals

JP=JAMA Psychiatry; AJP=American Journal of Psychiatry; BJP=British Journal of Psychiatry; PM=Psychological Medicine; APS=Acta Psychiatrica Scandinavica; JAP=Journal of Abnormal Psychology; SB=Schizophrenia Bulletin; MP=Molecular Psychiatry; JAD=Journal of Affective Disorders; JNMD=Journal of Nervous and Mental Disease; SP=Social Psychiatry and Psychiatric Epidemiology. Biological Psychiatry had no relevant articles in their first 2013 issues.

#### First issue 2013

| First Author   | Journal | Key Predictors                                | Disorder/Trait of Interest | Study Number | Level(s) | Within or Between Levels | Results                                                                                                    |
|----------------|---------|-----------------------------------------------|----------------------------|--------------|----------|--------------------------|------------------------------------------------------------------------------------------------------------|
| Kubota (1)     | JP      | Thalamo-cortical connectivity in MRI          | Schizophrenia              | 1            | B3       | Within                   | Reduced right thalamo-cortical connectivity                                                                |
| Georgiades (2) | JP      | Autism traits                                 | Autism Spectrum            | 2            | B4/E2    | Within                   | Autistic traits seen by 12 months of age in 19% of high risk siblings                                      |
| Suzuki (3)     | JP      | Microglia activation in brain assessed by PET | Autism Spectrum            | 3            | B2       | Within                   | Excess microglial activation in multiple brain regions in autism spectrum subjects                         |
| Ecker (4)      | JP      | Brain surface anatomy assessed by MRI         | Autism Spectrum            | 4            | B3       | Within                   | Subjects with autism spectrum have significant differences in cortical volume, thickness and surface area. |
| Volk (5)       | JP      | Air pollution                                 | Autism                     | 5            | E3       | Within                   | Exposure to air pollution during pregnancy and 1 <sup>st</sup> year of live associated with autism.        |

|               |     |                                                                  |                                 |    |            |         |                                                                                                                     |
|---------------|-----|------------------------------------------------------------------|---------------------------------|----|------------|---------|---------------------------------------------------------------------------------------------------------------------|
| Kendler (6)   | JP  | Patterns of criteria endorsement between and within twin pairs   | Conduct Disorder                | 6  | B4, E2, E1 | Between | DSM Criteria for CD reflect 2 genetic and 1 shared environmental liability factors.                                 |
| Haghighi (7)  | JP  | Prenatal exposure to cigarette smoking, diet and amygdala volume | Obesity                         | 7  | E1, B5, B3 | Between | Prenatal exposure to smoking increases fat preference and risk for obesity via structural variation in the amygdala |
| Zanarini (8)  | AJP | Defense Mechanisms                                               | Borderline Personality Disorder | 8  | P3         | Within  | Borderline patients had lower mature and higher immature defenses than other personality disorder patients.         |
| Brambilla (9) | BJP | Hippocampal anatomy                                              | Schizophrenia                   | 9  | B3         | Within  | Within schizophrenic subjects, shape deflation was associated with poorer clinical and social functioning.          |
| Wojcik (10)   | PM  | Birth Weight                                                     | Depression                      | 10 | B5         | Within  | A weak association was observed between low birth weight and depression                                             |
| Cents (11)    | PM  | Trajectories of Maternal Depressive Symptoms                     | Child Problem Behavior          | 11 | E2, B4     | Within  | Maternal trajectories predicted child problem behaviors                                                             |
| Rawal (12)    | PM  | Reward Responsiveness                                            | Depression                      | 12 | P1         | Within  | Abnormalities in reward processing predicted depression severity and onset in adolescence.                          |
| Sörberg (13)  | PM  | Cognitive Ability                                                | Suicide                         | 13 | P1         | Within  | Low IQ predicted suicide and suicide attempt                                                                        |
| Sareen (14)   | PM  | Adverse Childhood Experiences                                    | Mood and anxiety disorders      | 14 | E1         | Within  | Adverse childhood events were associated with mood and anxiety disorders.                                           |

|              |    |                                                                                                        |                                                  |    |            |         |                                                                                                                                                   |
|--------------|----|--------------------------------------------------------------------------------------------------------|--------------------------------------------------|----|------------|---------|---------------------------------------------------------------------------------------------------------------------------------------------------|
| Blair (15)   | PM | Recruitment of frontal and parietal cortex and attention measures in presence of emotional distractors | Post-traumatic Stress Disorder                   | 15 | B3, P1     | Between | Heightened emotional responsiveness in PTSD patients can interfere with attention mediated by poorer recruitment of key cortical regions.         |
| Wynn (16)    | PM | Event-related potentials and facial affect processing                                                  | Schizophrenia and bipolar illness                | 16 | B3, P1     | Between | Schizophrenia patients had lower emotion identification accuracy, smaller N170 accuracy and longer N170 latency.                                  |
| Seidman (17) | PM | Neuropsychological performance at age 7 and family history                                             | Schizophrenia and bipolar diagnosis in adulthood | 17 | P1,B4      | Between | Premorbid neuropsychological defects are found in individuals who later develop schizophrenia especially in those with a positive family history. |
| Madre (18)   | PM | fMRI during performance of a neuropsychological test (n-back)                                          | Schizoaffective Disorder                         | 18 | B3, P1     | Between | Schizoaffective patients showed a pattern of reduced frontal cortical activation and this persisted controlling for performance.                  |
| Liddle (19)  | PM | Auditory detection task during fMRI                                                                    | Schizophrenia and unaffected siblings            | 19 | B3, P1, B4 | Between | Inefficient cerebral cortical recruitment was a vulnerability marker for schizophrenia                                                            |
| Larrson (20) | PM | Patterns of criteria endorsement between and within twin pairs                                         | ADHD                                             | 20 | B4, E2, E1 | Between | In adults, self-report ADHD symptoms are moderately heritable.                                                                                    |

|                |     |                                                                 |                                       |    |                |         |                                                                                                                                                 |
|----------------|-----|-----------------------------------------------------------------|---------------------------------------|----|----------------|---------|-------------------------------------------------------------------------------------------------------------------------------------------------|
| Cho (21)       | PM  | Urine cotinine levels and continuous performance test variables | ADHD symptoms                         | 21 | B5, P1         | Between | The association between nicotine exposure and ADHD symptoms is mediated by impairments in attention and inhibitory control.                     |
| Varghese (22)  | APS | Mother-child resemblance                                        | Delusion-like experiences             | 22 | B4/E2          | Within  | Mother and child scores for delusion-like experiences were positively correlated.                                                               |
| Klein (23)     | JAP | Multiple predictors in a community sample                       | Onset of MD                           | 23 | E1, B4, P4, B5 | Between | Female gender, family history, childhood sexual abuse, prior anxiety disorder, poor physical health, and depressive symptoms predicted MD onset |
| Aderka (24)    | JAP | Information Seeking                                             | Social Anxiety Disorder               | 24 | P1             | Within  | Individuals with SAD sought less information before making social rank ratings.                                                                 |
| Timpano (25)   | JAP | Self-control                                                    | Hoarding                              | 25 | P2             | Within  | Low levels of self-control were associated with greater hoarding symptoms.                                                                      |
| Rodebaugh (26) | JAP | Interpersonal constraint                                        | Generalized Social Anxiety            | 26 | P2             | Within  | In an iterated prisoner's dilemma, individuals with generalized social anxiety disorder showed greater interpersonal constraint.                |
| Felton (27)    | JAP | Response styles, Stressors                                      | Post-stress Rumination and Depression | 27 | P2,E1          | Between | Pre-stress response styles predicted post-stress rumination and depression and interacted with stressors.                                       |

|                  |     |                                                                                             |                                 |    |                                                 |         |                                                                                                                                                                 |
|------------------|-----|---------------------------------------------------------------------------------------------|---------------------------------|----|-------------------------------------------------|---------|-----------------------------------------------------------------------------------------------------------------------------------------------------------------|
| Wade (28)        | JAP | Patterns of item endorsement between and within twin pairs over time                        | Weight and Shape concerns       | 28 | B4,E2,E1                                        | Between | Over adolescence, individual-specific environmental influences were largely age specific while shared environmental and genetic influences were largely stable. |
| Klump (29)       | JAP | Level of ovarian hormones, negative affect                                                  | Emotional eating                | 29 | B5,P4                                           | Between | Controlling for negative affect, changes in ovarian hormones predicted emotional eating across the menstrual cycle                                              |
| Brook (30)       | JAP | Cognitive Empathy                                                                           | Psychopathy                     | 30 | P1                                              | Within  | Psychopathy was inversely associated with empathic accuracy and the number of responses when rating the emotional states of others.                             |
| Sadeh (31)       | JAP | 5-HTTLPR and MAO-A polymorphisms and childhood Abuse                                        | Psychopathy                     | 31 | B1, E1                                          | Between | Psychopathy was predicted abuse and by both genetic variants with no interaction between them.                                                                  |
| Bornovalova (32) | JAP | Sexual, emotional, and physical abuse in childhood in a cotwin control design               | Borderline Personality Disorder | 32 | E1,E2 as exposure; B4/E2 to control confounding | Within  | The association between childhood abuse and BPD traits was not causal, arising from common genetic influences                                                   |
| Heritage (33)    | JAP | Response modulation using a lexical decision stop signal task and event-related potentials. | Psychopathic traits             | 33 | B3, P1                                          | Between | The impulsive antisocial psychopathy factor was related to poor behavioral performance and reduced processing of the stop signal.                               |

|                        |     |                                                                                                      |                          |    |                   |         |                                                                                                                                                                                                                                          |
|------------------------|-----|------------------------------------------------------------------------------------------------------|--------------------------|----|-------------------|---------|------------------------------------------------------------------------------------------------------------------------------------------------------------------------------------------------------------------------------------------|
| De Sá<br>Teixeira (34) | JAP | Perception and processing<br>of motion                                                               | Schizophrenia            | 34 | B3                | Within  | Compared to controls,<br>schizophrenics<br>demonstrated a lack of an<br>effect of target's velocity<br>upon the magnitude of<br>Representational<br>Momentum                                                                             |
| Slutske (35)           | JAP | Personality as measured<br>in twins and cotwins                                                      | Disordered<br>Gambling   | 35 | B4                | Within  | Genetic influences in<br>normal personality traits<br>explained 40% of the<br>genetic risk for disordered<br>gambling.                                                                                                                   |
| Fusar-Poli<br>(36)     | SB  | Density of striatal<br>dopamine terminals as<br>assessed by Positron<br>Emission Tomography<br>(PET) | Schizophrenia            | 36 | B2                | Within  | Meta-analysis showed no<br>evidence<br>For altered density of<br>striatal dopamine terminals<br>in schizophrenia.                                                                                                                        |
| Beck<br>(37)           | SB  | Dysfunctional attitudes<br>and expectancies and<br>psychiatric symptoms                              | Deficit<br>Schizophrenia | 37 | P3, P4            | Within  | The deficit group scored<br>significantly worse on<br>measures of insight,<br>emotion recognition,<br>defeatist attitudes, and<br>asocial beliefs but better on<br>of depression, anxiety, and<br>distress than the nondeficit<br>group. |
| Fett<br>(38)           | SB  | Cognitive tests and<br>symptoms                                                                      | Psychotic<br>Symptoms    | 38 | P1, P4, B4,<br>E2 | Between | Social cognitive<br>performance was associated<br>with disorganized/negative<br>symptoms within patients<br>and with subclinical<br>disorganization in siblings.                                                                         |

|                 |    |                                                                                                                |                                     |    |            |         |                                                                                                                                                                                  |
|-----------------|----|----------------------------------------------------------------------------------------------------------------|-------------------------------------|----|------------|---------|----------------------------------------------------------------------------------------------------------------------------------------------------------------------------------|
| Kantrowitz (39) | SB | Voice emotion recognition                                                                                      | Emotion Processing in Schizophrenia | 39 | P1         | Within  | The differential identification pattern for frequently modulated tones correlated with deficits in basic tone-matching ability, voice emotion recognition, and negative symptoms |
| Matthews (40)   | SB | Gesture Imitation and working memory                                                                           | Schizophrenia                       | 40 | P1         | Within  | Gesture imitation was impaired in schizophrenia, especially when the production of an imitation depended upon working memory                                                     |
| Marsman (41)    | SB | Glutamate in vivo in brain assessed by magnetic resonance spectroscopy (MRS)                                   | Schizophrenia                       | 41 | B2         | Within  | Meta-analysis showed that medial frontal region glutamate was decreased in schizophrenia.                                                                                        |
| Wong (42)       | SB | Levels of mRNA expression of truncated brain-derived neurotrophic factor (BDNF) receptors in post-mortem brain | Schizophrenia                       | 42 | B1         | Within  | Significant increases in mRNA expression of two truncated receptor isoforms in people with schizophrenia                                                                         |
| Jessen (43)     | SB | Concentration of N-acetylaspartylglutamate (NAAG) assessed by proton MRS and neuropsychological functioning    | Schizophrenia                       | 43 | B2, P1, P4 | Between | NAAG was increased in schizophrenia patients and frontal levels were inversely correlated with negative and total symptoms and positively correlated with episodic memory.       |

|               |     |                                                                                     |                                            |    |           |         |                                                                                                                         |
|---------------|-----|-------------------------------------------------------------------------------------|--------------------------------------------|----|-----------|---------|-------------------------------------------------------------------------------------------------------------------------|
| Nielsen (44)  | SB  | Maternal infection during pregnancy and maternal and paternal infections in general | Schizophrenia                              | 44 | B5        | Within  | Increased risk in offspring is associated with prenatal infection specifically and parental infections generally.       |
| Coughlin (45) | MP  | Soluble superoxide dismutase-1 (SOD1) in cerebrospinal fluid                        | Schizophrenia                              | 45 | B5        | Within  | Reduction of soluble SOD1 in cerebrospinal fluid of patients with recent-onset schizophrenia                            |
| Melchior (46) | MP  | Socioeconomic position                                                              | Depression                                 | 46 | E2        | Within  | Long-term depression trajectories followed a socioeconomic gradient                                                     |
| Munkholm (47) | JAD | Cytokine levels                                                                     | Bipolar Illness                            | 47 | B5        | Within  | In a meta-analysis, levels of several cytokines were elevated in manic patients versus controls or euthymic patients.   |
| Zhou (48)     | JAD | Population sex ratio                                                                | Depression                                 | 48 | E3        | Within  | High male to female sex ratio was a robust predictor of depression in unmarried men.                                    |
| Tomita (49)   | JAD | Neighborhood-level social capital                                                   | Depression                                 | 49 | E3, E1,E2 | Within  | Controlling for social class and education, low levels of social capital predicted high levels of depression.           |
| Dudek (50)    | JAD | Age at onset, treatment response, clinical course                                   | Onset of mania in patients with depression | 50 | P4, B5    | Between | Conversion to bipolar illness was predicted by early age at onset, poor treatment response and multiple prior episodes. |
| Hunt (51)     | JAD | Duration of illness, stressful life events, history of suicide attempts             | Suicide                                    | 51 | P4, E1    | Between | Suicide predicted by a short duration of illness, prior attempts and stressful life events.                             |

|               |      |                                                                  |                                           |    |            |         |                                                                                                                                                                                    |
|---------------|------|------------------------------------------------------------------|-------------------------------------------|----|------------|---------|------------------------------------------------------------------------------------------------------------------------------------------------------------------------------------|
| Niu (52)      | JAD  | Diet                                                             | Depression                                | 52 | B5         | Within  | A tomato rich diet was associated with reduced risk for depression                                                                                                                 |
| Shankman (53) | JAD  | Performance on an emotion recognition and an emotion acuity test | Pediatric bipolar illness                 | 53 | P1, P2     | Within  | Ill patients misidentified sad, fearful, and neutral faces more often than controls and this effect was mediated by irritability.                                                  |
| Zhang (54)    | JNMD | Immigration-related factors                                      | Anxiety, depression and suicidal ideation | 54 | E1, E2, E3 | Within  | US-born Chinese and those who immigrated to the US $\leq$ age 18 were at higher risk for depressive and anxiety disorders and suicidal ideation vs. their China-born counterparts. |
| Gilman (55)   | SP   | Financial strain and low income                                  | Depressive symptoms and suicidal ideation | 55 | E1, E2     | Within  | Financial strain and low income were associated with both levels of depression and suicidal ideation.                                                                              |
| Pan (56)      | SP   | Family income and psychiatric illness                            | Suicidal ideation                         | 56 | E2, P4     | Between | An inverse association between family income and suicidal ideation was seen which was stronger in those with psychiatric illness.                                                  |
| Jarrin (57)   | SP   | Ethnic Density                                                   | Psychiatric "caseness"                    | 57 | E3         | Within  | No association was observed between ethnic density of Ecuadorians living in Spain and their risk for psychiatric illness.                                                          |

## Second issue 2013

| First Author       | Journal | Key Predictors                                                  | Disorder/Trait of Interest               | Study Number | Level(s) | Within or Between Levels | Results                                                                                                                                     |
|--------------------|---------|-----------------------------------------------------------------|------------------------------------------|--------------|----------|--------------------------|---------------------------------------------------------------------------------------------------------------------------------------------|
| Abas (58)          | JP      | Outmigration of Children                                        | Depression                               | 58           | E2       | Within                   | Having all children out-migrate was associated with a lower risk of depression.                                                             |
| Kendler (59)       | JP      | Age differences and older-younger relationship in sibling pairs | Drug Abuse (DS)                          | 59           | E2       | Within                   | Siblings closer in age were more similar in risk for DA. DA was more strongly transmitted from older→younger than younger→older siblings.   |
| Ramanathan (60)    | JP      | Macroeconomic environment during infancy                        | Behavior Problems in Adolescence         | 60           | E3       | Within                   | Increasing unemployment rates at age 1 was associated with an increased risk for a range of externalizing behaviors during adolescence.     |
| Wium-Andersen (61) | JP      | CRP levels                                                      | Psychological distress and depression    | 61           | B5       | Within                   | Elevated levels of CRP were associated with increased risk for psychological distress and depression.                                       |
| Ehlers (62)        | AJP     | Family, linkage and genetic association studies                 | Substance dependence in Native Americans | 62           | B2, B4   | Within                   | Family, linkage and association studies all support the role of genetic factors in the etiology of substance dependence in this population. |
| Anglin (63)        | BJP     | Levels of vitamin D                                             | Depression                               | 63           | B5       | Within                   | Low vitamin D concentrations were associated with risk for depression.                                                                      |
| Sellers (64)       | BJP     | Offspring of mothers with recurrent depression                  | New-onset psychopathology                | 64           | B4,E2    | Between                  | The number of co-occurring problems in mothers predicted new-onset offspring disorder                                                       |
| Matheson (65)      | PM      | Childhood adversity                                             | schizophrenia                            | 65           | E1, E2   | Within                   | In a meta-analysis, increased rate of childhood adversity was associated with risk for schizophrenia.                                       |

|                   |     |                                                                                           |                                          |    |                |         |                                                                                                                                                                  |
|-------------------|-----|-------------------------------------------------------------------------------------------|------------------------------------------|----|----------------|---------|------------------------------------------------------------------------------------------------------------------------------------------------------------------|
| Khandaker (66)    | PM  | Prenatal maternal infection and maternal proinflammatory cytokines                        | Schizophrenia and associated MRI changes | 66 | E2, B3, B5     | Between | Prenatal exposure to a range of infections and inflammatory responses increases risk for schizophrenia and was associated with brain abnormalities               |
| Sarkar (67)       | PM  | Diffusion tensor magnetic resonance imaging tractography                                  | Conduct Disorder                         | 67 | B3             | Within  | Individuals with conduct disorder had significant differences in the connectivity and maturation of the uncinate fasciculus.                                     |
| Fournier (68)     | PM  | Implicit emotional faces task assessed by fMRI.                                           | Major Depression                         | 68 | B3,P1          | Between | Adults with MD showed significantly greater right-sided amygdala activity to angry and happy conditions than controls.                                           |
| Morein-Zamir (69) | PM  | Go/no go task                                                                             | Obsessive-compulsive disorder (OCD)      | 69 | P1             | Within  | Individuals with OCD showed reduced response control selectively under punishment conditions                                                                     |
| Geerlings (70)    | PM  | Structural MRI scan                                                                       | Major Depression                         | 70 | B3             | Within  | Current MD in elderly subjects was associated with widespread gray- and white-matter brain atrophy                                                               |
| Bianco (71)       | PM  | fMRI during implicit and explicit processing of facial stimuli and COMT genotype          | Schizophrenia                            | 71 | B1, B3, P1     | Between | Complex interactions seen between genetically determined dopamine signaling and risk for schizophrenia on prefrontal cortical activity during emotion processing |
| Breslau (72)      | PM  | Six predisposing familial or environmental risks and 4 levels of traumas                  | PTSD                                     | 72 | B4, E1, E2, E3 | Between | Predispositions increase the risk of PTSD following sexual assault as much as they do following less severe traumas.                                             |
| Shankman (73)     | JAP | sensitivity to threat measured by startle and to reward measured by frontal EEG asymmetry | Panic Disorder and Major Depression      | 73 | B3             | Within  | Heightened sensitivity to threat was specific to panic disorder and reduced sensitivity to MD.                                                                   |
| Pettit (74)       | JAP | Parental history of MD and history of stressful life events                               | Recurrent MD                             | 74 | B4,E2          | Between | Risk for recurrent MD arises from both familial risk and stressful life events after first onset.                                                                |

|                     |     |                                                                         |                                                   |    |            |         |                                                                                                                                              |
|---------------------|-----|-------------------------------------------------------------------------|---------------------------------------------------|----|------------|---------|----------------------------------------------------------------------------------------------------------------------------------------------|
| Bagge (75)          | JAP | Negative Life Events                                                    | Suicide Attempt                                   | 75 | E1         | Within  | Individuals were at increased risk of attempting suicide soon after a negative life event.                                                   |
| Endrass (76)        | JAP | Electrophysiological correlates of feedback processing                  | Obsessive-compulsive disorder (OCD)               | 76 | B3         | Within  | OCD patients were impaired in specific aspects of feedback learning and flexible behavioral adjustments.                                     |
| Olatunji (77)       | JAP | Emotional attentional blink task with combat-related threat distracters | PTSD                                              | 77 | P1         | Within  | PTSD subjects displayed an attentional bias toward combat related stimuli                                                                    |
| Culbert (78)        | JAP | Prenatal testosterone exposure assessed indirectly via sex of cotwin    | Disordered eating attitudes                       | 78 | B5         | Within  | During puberty, females from opposite-sex twin pairs exhibited lower disordered eating attitudes than females from same-sex twin pairs       |
| Racine (79)         | JAP | Negative Urgency                                                        | Dysregulated eating                               | 79 | P2, B4, E1 | Between | Negative urgency predicted dysregulated eating and most of this association was due to genetic covariation.                                  |
| Baskin-Sommers (80) | JAP | Emotion modulated startle and late positive potential (LPP)             | Psychopathy                                       | 80 | B3         | Within  | Psychopathic individuals displayed a deficit in emotion modulated startle to novel pictures, but differences in LPP during familial picture. |
| Strauss (81)        | JAP | Emotional Attentional Blink paradigm                                    | Schizophrenia with high and low negative symptoms | 81 | B3         | Within  | Emotional stimuli have a bottom-up competitive advantage in low negative patients and controls but not in high negative symptom patients.    |
| Keane (82)          | JAP | The depth inversion illusion (DII)                                      | Schizophrenia                                     | 82 | P1         | Within  | Schizophrenia patients experienced fewer DIIs with a variety of object types and viewing conditions                                          |
| Clark (83)          | JAP | Bubbles Facial Emotion Perception Task                                  | Schizophrenia                                     | 83 | P1         | Within  | Evidence for aberrant patterns of visual facial information usage in schizophrenia                                                           |
| Alderson (84)       | JAP | Working memory                                                          | ADHD in Adults                                    | 84 | P1         | Within  | Central executive and phonological storage/rehearsal were both impaired in adults with ADHD                                                  |

|               |     |                                                                                            |                                                                          |    |           |         |                                                                                                                                                                                                                                                                                                                 |
|---------------|-----|--------------------------------------------------------------------------------------------|--------------------------------------------------------------------------|----|-----------|---------|-----------------------------------------------------------------------------------------------------------------------------------------------------------------------------------------------------------------------------------------------------------------------------------------------------------------|
| Petersen (85) | JAP | Language subtests of standardized achievement instruments                                  | Inattentive-hyperactive and externalizing problems                       | 85 | P1        | Within  | Language ability predicted development of I<br>Inattentive-hyperactive and externalizing problems                                                                                                                                                                                                               |
| Bledsoe (86)  | JAP | Brain cortical thickness in cingulate cortex Stroop Inhibition test                        | ADHD                                                                     | 86 | B3, P1    | Between | Significant cortical thinning of the right rostral anterior cingulate cortex in children with ADHD but no cortical thickness association with inhibitory control.                                                                                                                                               |
| Wilbertz (87) | JAP | Delay aversion in fMRI with behavioral measures of delay discounting and delay frustration | ADHD                                                                     | 87 | B3, P1,P4 | Between | Evidence for an exacerbated negative emotional state during the anticipation and processing of delay in ADHD                                                                                                                                                                                                    |
| Stefanis (88) | SB  | ERBB4 single nucleotide polymorphisms                                                      | verbal working memory (VWM), trait schizotypy, and psychotic experiences | 88 | B1        | Within  | ERBB4 variants were associated in a general population sample with VWM and psychotic experiences.                                                                                                                                                                                                               |
| Kuhn (89)     | SB  | Meta-analysis - Resting-State Brain Activity assessed by fMRI                              | Schizophrenia and Depression                                             | 89 | B3        | Within  | Hypoactivation in ventromedial prefrontal cortex (vmPFC), hippocampus, cingulate cortex, and the precuneus, and hyperactivation in lingual gyrus in schizophrenia. Hyperactivation in vmPFC, ventral striatum, and thalamus and hypoactivation in postcentral gyrus, fusi-form gyrus, and insula in depression. |
| Chen (90)     | SB  | Striatal dopamine transporter (DAT) availability assessed by SPECT                         | Schizophrenia                                                            | 90 | B2        | Within  | No significant differences in DAT levels in drug naïve schizophrenic patients versus controls in this study or in a meta-analysis.                                                                                                                                                                              |
| Wong (91)     | SB  | Level of NPAS3 mRNA and MiR-17 in post-mortem brain                                        | Schizophrenia                                                            | 91 | B1        | Within  | In prefrontal cortex in schizophrenia patients, elevations were found in miR-17 expression but not levels of NPAS3 mRNA.                                                                                                                                                                                        |
| Wiener (92)   | SB  | Principal components of heritability (PCH) derived from 9 neurocognitive domains           | Schizophrenia and their relatives                                        | 92 | P1, B4    | Between | The first PCH, indexing largely spatial processing and emotion recognition, was highly heritable and genetically correlated with schizophrenia.                                                                                                                                                                 |

|                  |    |                                                                                                 |                                         |     |        |         |                                                                                                                                             |
|------------------|----|-------------------------------------------------------------------------------------------------|-----------------------------------------|-----|--------|---------|---------------------------------------------------------------------------------------------------------------------------------------------|
| Constantino (93) | MP | Resemblance in full and half siblings                                                           | Autism                                  | 93  | B4     | Within  | Heritability of autism estimated to equal ~ 0.60.                                                                                           |
| Crowley (94)     | MP | Deep sequencing of 10 candidate genes                                                           | Schizophrenia                           | 94  | B1     | Within  | Classical schizophrenia candidate genes do not harbor uncommon coding region variations of etiological importance.                          |
| Rucker (95)      | MP | Large, rare copy number variants (CNVs)                                                         | Major Depression                        | 95  | B1     | Within  | Excess rates of CNVs in patients with recurrent major depression.                                                                           |
| Gale (96)        | MP | Intelligence                                                                                    | Bipolar Illness                         | 96  | P2     | Within  | Risk for bipolar illness increased with lower IQ except in those with no comorbidity where there was a “J-shaped” distribution.             |
| Chen (97)        | MP | SNP variants in a case-control GWAS design                                                      | Bipolar Illness                         | 97  | B1     | Within  | Identification of three new putative risk genes for bipolar illness: TRANK1, LMAN2L and PTGFR.                                              |
| Fillman (98)     | MP | Neuroimmune mRNA expression levels in dorso-lateral prefrontal cortex                           | Schizophrenia                           | 98  | B1     | Within  | Changes seen in expression levels in the inflammatory response pathway in 40% of individuals with schizophrenia.                            |
| Mistry (99)      | MP | Genome wide mRNA expression levels in postmortem brain                                          | Schizophrenia                           | 99  | B1     | Within  | Analyses across seven independent studies showed evidence for 39 genes that are upregulated in schizophrenia and 86 that are downregulated. |
| Lu (100)         | MP | Targeted-association analysis of 476 haplotype blocks in families with Autism Spectrum Disorder | Nonverbal communication                 | 100 | B1     | Within  | Strongest association seen in introns to a Nerve Growth Factor gene                                                                         |
| Christakou (101) | MP | fMRI during a vigilance task with increasing attentional load.                                  | ADHD and autism spectrum disorder (ASD) | 101 | B3, P1 | Between | ADHD and ASD boys have both shared and disorder specific abnormalities in brain function during sustained attention.                        |

|                      |      |                                                                                                      |                                       |     |            |         |                                                                                                                                                                      |
|----------------------|------|------------------------------------------------------------------------------------------------------|---------------------------------------|-----|------------|---------|----------------------------------------------------------------------------------------------------------------------------------------------------------------------|
| Fandiño-Losada (102) | JAD  | Serotonin transporter polymorphism and loss of partner in last year                                  | Depression                            | 102 | B1, E1     | Between | Those with the low activity transporter variants were at increased risk for depression given partner loss.                                                           |
| Christensen (103)    | JAD  | Self-reported levels of burdensomeness and belongingness.                                            | Suicidal Ideation                     | 103 | P2         | Within  | Interactions were found between perceived burdensomeness and thwarted belongingness predicted suicidal ideation.                                                     |
| Hayakawa (104)       | JAD  | Voxel-based morphometry of the brain gray matter and diffusion tensor imaging (DTI) of white matter. | Depressive symptoms                   | 104 | B3         | Within  | Gray matter volume reduction and white matter integrity change in specific frontal brain regions may be associated with depressive symptoms in women                 |
| Langås (105)         | JAD  | Presence or absence of drug abuse associated with onset                                              | Depression                            | 105 | B5         | Within  | Independent episodes were clinically distinct and generally more severe than drug abuse related episodes.                                                            |
| Mathell (106)        | JNMD | Emotional Intelligence                                                                               | Borderline Personality Disorder (BPD) | 106 | P2         | Within  | Patients with BPD had deficits in their ability to understand, whereas no differences emerged with respect to their ability to perceive, use, and regulate emotions. |
| Schienze (107)       | JNMD | Trait Disgust                                                                                        | Borderline Personality Disorder (BPD) | 107 | P2         | Within  | Patients with BPD reported elevated levels of trait disgust, especially for the area of self-disgust.                                                                |
| Kaess (108)          | JNMD | Personality                                                                                          | Borderline Personality Disorder (BPD) | 108 | P2         | Within  | BPD patients demonstrated higher novelty seeking and harm avoidance but higher levels of reward dependence.                                                          |
| Krause-Utz (109)     | JNMD | Self-report impulsivity and response inhibition before and after an experimental stress induction    | Borderline Personality Disorder (BPD) | 109 | P1, P2, E1 | Between | BPD patients demonstrated a stress-dependent increase of state impulsivity and impaired response inhibition.                                                         |
| Sullivan (110)       | JNMD | Prior psychiatric illness and exposure to hurricane Katrina                                          | New onset psychiatric disorder        | 110 | P4, E1     | Between | The odds of developing a new psychiatric disorder after exposure were 6.8 times greater in those with a preexisting illness.                                         |

|                  |    |                                            |                               |     |            |        |                                                                                                                                                               |
|------------------|----|--------------------------------------------|-------------------------------|-----|------------|--------|---------------------------------------------------------------------------------------------------------------------------------------------------------------|
| Pinto-Meza (111) | SP | Social inequalities and place of residence | Psychiatric disorder          | 111 | E1, E2, E3 | Within | Unemployment, disability, lower education, urban living and residing in Northern Ireland, Portugal and Belgium are associated with risk for mental disorders. |
| Luitel (112)     | SP | Exposure to conflict in Nepalese civil war | Depression, anxiety and PTSD. | 112 | E3         | Within | Those experiencing negative effects of the conflict were at higher risk for depression, anxiety and PTSD.                                                     |
| Amstadter (113)  | SP | Trauma exposure.                           | Symptoms of PTSD              | 113 | E1         | Within | In a civilian population, type and number of traumatic events experiences were related to the probability of having symptoms of PTSD.                         |
| Winterrowd (114) | SP | Deviance of friends                        | Suicidal ideation             | 114 | E1         | Within | Suicidal ideation in adolescence was prospectively predicted by deviancy level of friends.                                                                    |
| Colman (115)     | SP | Childhood trauma and recent stress         | Depression and heavy drinking | 115 | E1, E2     | Within | Childhood trauma increases risk for depression and heavy drinking. Trauma may moderate the effect of stress on depression.                                    |
| Sung (116)       | SP | Mean ambient temperature of a township     | Bipolar disorder              | 116 | E3         | Within | Increased risks of bipolar disorder admissions associated with the increasing temperature.                                                                    |

No relevant articles in Acta Psychiatric Scand 2/13 issue.

### Third issue 2013

| First Author   | Journal | Key Predictors                                                          | Disorder/Trait of Interest                   | Study Number | Level(s) | Within or Between Levels | Results                                                                                                                             |
|----------------|---------|-------------------------------------------------------------------------|----------------------------------------------|--------------|----------|--------------------------|-------------------------------------------------------------------------------------------------------------------------------------|
| MacCabe (117)  | JP      | Verbal, spatial, and inductive ability at ages 13 and 18.               | Psychosis                                    | 117          | P1       | Within                   | A decline in cognitive performance in adolescence and young adulthood was associated with increased risk for psychosis in adulthood |
| Guha (118)     | JP      | Copy number variants                                                    | Schizophrenia                                | 118          | B1       | Within                   | A deletion at distal 16p11.2 was associated with risk for schizophrenia.                                                            |
| Steiner (119)  | JP      | NMDA-R antibodies measured in blood                                     | Schizophrenia, MD and borderline PD          | 119          | B5       | Within                   | Acutely ill patients with schizophrenia showed demonstrated an increased prevalence of NMDA-R antibodies                            |
| Croarkin (120) | JP      | TMS cortical excitability and inhibition                                | Major depression in children and adolescents | 120          | B3       | Within                   | Major depression in children and adolescents is associated with increased intracortical facilitation                                |
| Chang (121)    | JP      | Patterns of symptom endorsement between and within twin pairs over time | Symptoms of attention problems               | 121          | B4,E1    | Between                  | Attention problems were highly heritable in childhood, adolescence, and early adulthood.                                            |
| Nelson (122)   | JP      | Candidate gene single-nucleotide polymorphisms                          | Heroin dependence                            | 122          | B1       | Within                   | Significant associations found with SNPs in a set of genes on chromosome 11: NCAM1, TTC12, ANKK1, DRD2                              |
| Baller (123)   | AJP     | PET and fMRI studies                                                    | Premenstrual dysphoric disorder (PMDD)       | 123          | B3       | Within                   | PMDD patients showing greater prefrontal activation than comparison subjects.                                                       |
| White (124)    | AJP     | Decision making and fMRI                                                | Disruptive Behavior Disorders                | 124          | B3, P1   | Between                  | Affected youths showed altered use of expected value information within the ventromedial prefrontal cortex and anterior insula.     |

|                         |     |                                                                                         |                                                      |     |            |         |                                                                                                                                                                                                                         |
|-------------------------|-----|-----------------------------------------------------------------------------------------|------------------------------------------------------|-----|------------|---------|-------------------------------------------------------------------------------------------------------------------------------------------------------------------------------------------------------------------------|
| Rai (125)               | BJP | Socioeconomic factors at the country and individual level.                              | Depression                                           | 125 | E1, E2, E3 | Within  | Both individual-level and country level measures of SES impacted on risk for depression.                                                                                                                                |
| Vrshek-Schallhorn (126) | PM  | Cortisol awakening response (CAR) and stressful life events                             | Depression                                           | 126 | B5, E1     | Between | CAR prospectively predicts episodes of major depression independent of stressful life events.                                                                                                                           |
| Cisler (127)            | PM  | Resting state fMRI                                                                      | History of early life stress (ELS) and/or depression | 127 | B3, E1     | Between | Differences in network topology were seen specific to ELS exposure and to resiliency versus susceptibility to the depressogenic effects of ELS.                                                                         |
| Plant (128)             | PM  | Maternal child maltreatment, offspring maltreatment and exposure to depression in utero | Antisocial behavior and depression                   | 128 | B5, E1, E2 | Between | Interactions were seen between maternal and offspring maltreatment and in utero exposure to depression in predicting offspring antisocial behavior.                                                                     |
| Keilp (129)             | PM  | Neuropsychological functions                                                            | Suicide attempt                                      | 129 | P1         | Within  | Deficits in attention control, memory and working memory were associated with suicidal behavior                                                                                                                         |
| Delvecchio (130)        | PM  | fMRI studies of facial affect                                                           | Schizophrenia (SZ)and Bipolar Disorder (BD)          | 130 | B3         | Within  | BD patients show overactivation in subcortical regions and underactivation in prefrontal regions. SZ patients show over-activation within visual processing regions and reduced engagement of facial affect processing. |
| Brambilla (131)         | PM  | Incentive decision making in the Iowa Gambling Task                                     | Schizophrenia (SZ)and Bipolar Disorder (BD)          | 131 | P1         | Within  | Associative learning underlying expectancies was disrupted in SZ. BD was associated with increased incentive salience of gains.                                                                                         |
| Ljung (132)             | PM  | Parental schizophrenia                                                                  | Offspring suicide                                    | 132 | E1, E2, B4 | Between | Suicide risk in offspring was similar in genetically different relationships, suggesting an environmental mechanism.                                                                                                    |
| Dean (133)              | PM  | Facial affect processing MRI imaging.                                                   | First episode psychosis and siblings                 | 133 | B3, B4, P1 | Between | Speed of facial affect processing and cortico- limbic grey matter variation was disrupted in FEP patients and their relatives.                                                                                          |

|                |     |                                                                          |                                           |     |            |         |                                                                                                                          |
|----------------|-----|--------------------------------------------------------------------------|-------------------------------------------|-----|------------|---------|--------------------------------------------------------------------------------------------------------------------------|
| Pinheiro (134) | PM  | Event-related potential (ERP) correlates of emotional prosody processing | Schizophrenia                             | 134 | P1         | Within  | Abnormalities in prosody processing occurred in SZ at the three stages and are enhanced in a semantic content condition. |
| Boydell (135)  | APS | Unemployment and ethnicity                                               | Psychosis                                 | 135 | B4, E1, E3 | Between | Both unemployment and being of color increased risk for psychosis but no interaction was seen between them.              |
| Mogg (136)     | JAP | Panic Disorder in Mother                                                 | Attentional bias                          | 136 | B4, P1, E2 | Between | An attentional threat bias was seen in daughters of mothers with panic disorder.                                         |
| Weinberg (137) | JAP | Error-related negativity (ERN) in event related potentials.              | Generalized anxiety disorder              | 137 | B3         | Within  | The GAD group had larger ERN and this was not seen in those comorbid with MD.                                            |
| Buu (138)      | JAP | Gender, age at drinking, delinquency and specific symptoms               | Alcohol Dependence                        | 138 | P4         | Within  | Onset of AD was best predicted by continued use despite having persistent interpersonal problems and tolerance.          |
| Rose (139)     | SB  | Nine risk genes for SZ                                                   | Imaging and neurocognitive studies of SZ. | 139 | B1,B3, P1  | Between | In a meta-analysis, imaging studies reported larger effect sizes than cognitive investigations.                          |
| Lin (140)      | SB  | Wisconsin Card Sorting Test (WCST)                                       | Relatives of patients with SZ             | 140 | B4, P1, E2 | Between | Some WCST deficits were seen in certain relative groups. WCST itself was only modestly familial.                         |
| Plomp (141)    | SB  | Visual processing and evoked EEG responses                               | Schizophrenia                             | 141 | B3, P1     | Between | Patients showed reduced visual discrimination accuracy and deficits in certain evoked EEG responses.                     |
| Lee (142)      | SB  | Facial Affect Recognition                                                | Schizophrenia                             | 142 | P1,E1      | Between | With situational context provided, no deficit was seen in patients with schizophrenia.                                   |
| Zhao (143)     | SB  | Rare CNVs and common SNPs at 15q11.2                                     | Schizophrenia                             | 143 | B1         | Within  | Both rare deletions and common variants at 15q11.2 were associated with schizophrenia.                                   |

|                    |      |                                                                 |                                      |     |        |         |                                                                                                                                                     |
|--------------------|------|-----------------------------------------------------------------|--------------------------------------|-----|--------|---------|-----------------------------------------------------------------------------------------------------------------------------------------------------|
| Aleksic (144)      | SB   | Variants in VAV3 gene and structural MRI                        | Schizophrenia                        | 144 | B1, B3 | Within  | Both rare and common variants in VAV3 may be related to risk for schizophrenia and one variant impacts on temporal volume in schizophrenia patients |
| Ramaekers (145)    | MP   | Serum folate receptor autoantibodies                            | Autism                               | 145 | B5     | Within  | Serum folate receptor autoantibodies were more common in patients with autism                                                                       |
| Gamazon (146)      | MP   | Functional effects of genetic risk variants in human cerebellum | Bipolar Illness                      | 146 | B1, B2 | Within  | Among susceptibility variants, an excess impacted on mRNA expression and DNA methylation                                                            |
| Frye (147)         | MP   | Cerebral folate receptor autoantibodies                         | Autism Spectrum Disorder             | 147 | B5     | Within  | Folate receptor autoantibodies in serum and CSF were more common in patients with autism                                                            |
| Perales (148)      | SP   | Child adversities                                               | First onset of psychiatric disorders | 148 | E1, E2 | Within  | Childhood adversities were associated with onset of psychiatric disorders                                                                           |
| Leach (149)        | SP   | Relationship quality                                            | Symptoms of anxiety and depression   | 149 | E1     | Within  | Relationship quality mediated the association between relationship status and symptoms.                                                             |
| Yang (150)         | SP   | News coverage of suicides                                       | Suicides                             | 150 | E3     | Within  | Media reporting of suicide was syn-chronized with increased suicide deaths                                                                          |
| Raudino (151)      | SP   | Conduct disorder in parents                                     | Conduct disorder in Offspring        | 151 | B4, E2 | Between | Clear evidence was seen for intergenerational continuity in conduct problems mediated in part by parenting.                                         |
| Fischer-Kern (152) | JNMD | Mentalization                                                   | Major Depression                     | 152 | P3     | Within  | Patients with depression were impaired in their ability to identify and interpret mental states of the self and others.                             |
| Chen (153)         | JAD  | Allergic rhinitis                                               | Major Depression                     | 153 | B5     | Within  | Adolescents with allergic rhinitis had a higher prevalence of major depression at follow-up.                                                        |

|                 |     |                                                                     |                 |     |        |         |                                                                                                                               |
|-----------------|-----|---------------------------------------------------------------------|-----------------|-----|--------|---------|-------------------------------------------------------------------------------------------------------------------------------|
| Pannekoek (154) | JAD | Resting-state functional connectivity (RSFC) in fMRI                | Panic Disorder  | 154 | B3     | Within  | Altered RSFC found in panic disorder patients between areas involved in emotion regulation.                                   |
| Dasgupta (155)  | JAD | Social support, husband violence and alcohol use                    | Depression      | 155 | E1, E2 | Within  | High levels of social support protected against depression even in the setting of partner violence and alcohol abuse          |
| Fisher (156)    | JAD | Childhood stress and serotonin transporter poly-morphism (5-HTTLPR) | Depression      | 156 | B1, E1 | Between | An interaction was seen between certain classes of childhood stressors and 5-HTTLPR genotype in the prediction of depression. |
| Xu (157)        | JAD | Gender and SNPs in the SEZ6L gene                                   | Bipolar illness | 157 | B1, B5 | Within  | Genetic variants in the SEZ6L gene were associated with bipolar illness in females but not in males.                          |

For JAP, no third issue in 2013 yet available, so used last issue in 2012. TMS=transcranial magnetic stimulation.

#### Fourth issue 2013

| First Author       | Journal | Key Predictors                                                       | Disorder/Trait of Interest                         | Study Number | Level(s)   | Within or Between Levels | Results                                                                                                             |
|--------------------|---------|----------------------------------------------------------------------|----------------------------------------------------|--------------|------------|--------------------------|---------------------------------------------------------------------------------------------------------------------|
| Cantor-Graae (158) | JP      | Migration                                                            | Psychiatric disorders                              | 158          | E1, E2     | Within                   | All categories of foreign migration were associated with increased risk for at least 1 psychiatric disorder.        |
| Copeland (159)     | JP      | Bullies and victims of bullying                                      | Psychiatric disorders in adolescence and adulthood | 159          | E1         | Within                   | Both being bullied and being a bully were associated with increased risk for a range of psychiatric disorders.      |
| James (160)        | JP      | Neural networks as assessed by magneto-encephalography               | PTSD                                               | 160          | B3         | Within                   | Neural modulation involving decorrelation of neural networks distinguished resilient veterans from those with PTSD  |
| Wald (161)         | JP      | Threat vigilance, combat exposure and serotonin transporter genotype | Post-combat PTSD                                   | 161          | P1, B1, E1 | Between                  | Combat exposure interacted with threat-related attention and genotype to predict PTSD.                              |
| Asami (162)        | JP      | Grey matter as assessed by MRI                                       | Schizotypal Personality Disorder (SPD)             | 162          | B3         | Within                   | Men with SPD showed global and widespread smaller regional grey matter volume.                                      |
| Pearson (163)      | AJP     | Maternal Depressive Cognitive Styles                                 | Offspring Depressive Cognitive Styles              | 163          | B4, E2     | Between                  | A positive association was observed between maternal and offspring cognitive styles.                                |
| Kendler (164)      | AJP     | Age at first regular smoking                                         | Nicotine Dependence                                | 164          | B4, E2, E1 | Between                  | Controlling for shared environment and genetics, early onset of smoking increased nicotine dependence in adulthood. |
| Abel (165)         | AJP     | Fetal Growth Pattern                                                 | Autism Spectrum Disorder (ASD)                     | 165          | B5         | Within                   | ASD risk was increased in infants both very small and large for gestational age.                                    |
| Miller (166)       | AJP     | Traumatic Brain Injury                                               | Drug dependence                                    | 166          | B5, E1     | Between                  | Dependence to alcohol and nicotine were increased in those exposed to Traumatic Brain Injury.                       |

|                         |     |                                                                 |                                 |     |            |         |                                                                                                                                           |
|-------------------------|-----|-----------------------------------------------------------------|---------------------------------|-----|------------|---------|-------------------------------------------------------------------------------------------------------------------------------------------|
| Collip (167)            | BJP | Childhood trauma, FKBP5 SNP genotype                            | Psychotic symptoms              | 167 | B1, E1, E2 | Between | An interaction was seen between childhood trauma exposure and FKBP5 SNPs in risk for psychotic symptoms                                   |
| Drislane (168)          | PM  | P3 event-related potential response to noise probes.            | Psychopathy                     | 168 | B3         | Within  | Psychopaths showed significantly smaller amplitude of P3 response to noise probes                                                         |
| Salum (169)             | PM  | Threat related attention bias                                   | Pediatric psychiatric disorders | 169 | P1         | Within  | In distress-related disorders, high internalizing symptoms predicted vigilance towards threat. In fear disorders, the opposite was seen.  |
| Cohen-Woods (170)       | PM  | Molecular Genetics                                              | Major Depression                | 170 | B1         | Within  | This review paper examines the modest progress to date identifying specific molecular genetic variants predisposing to depression.        |
| Bar (171)               | APS | Heat pain thresholds and fMRI                                   | Anorexia                        | 171 | B3, P1     | Between | Increased heat pain thresholds were observed in anorexia patients along with stronger activation of the ipsilateral pons.                 |
| Sadeh (172)             | JAP | Anger, gender and history of sexual abuse                       | Suicide Attempt                 | 172 | P4, E1     | Between | Facets of anger differentially predicted suicide attempts as a function of gender and sexual victimization history.                       |
| Gorman Bozorgpour (173) | JAP | Go/no-go choice reaction time task and readiness potentials     | ADHD                            | 173 | B3, P1     | Between | Adults with ADHD exhibited weaker central preparation to respond to stimuli requiring a motor response and prompting response inhibition. |
| Ficks (174)             | JAP | Low birth weight                                                | ADHD                            | 174 | B5         | Within  | A negative associations between birth weight and ADHD and general externalizing symptoms also seen within twin pairs.                     |
| Mann (175)              | JAP | Reaction time to a computerized monetary response conflict task | Schizophrenia                   | 175 | P1         | Within  | Schizophrenia patients showed a significantly smaller incentive context effect than controls.                                             |
| Martin (176)            | JAP | Affective Interference Task                                     | Schizophrenia                   | 176 | P1         | Within  | Decrease in attention to affective information in schizophrenia.                                                                          |

|                |     |                                                                                 |                                          |     |                |         |                                                                                                                                   |
|----------------|-----|---------------------------------------------------------------------------------|------------------------------------------|-----|----------------|---------|-----------------------------------------------------------------------------------------------------------------------------------|
| Nelson (177)   | JAP | Family history, startle potentiation and frontal EEG asymmetry                  | Major Depression and Panic Disorder (PD) | 177 | B4, E2, B3, P1 | Between | Startle potentiation was associated with family history of PD and frontal EEG asymmetry was associated with family history of MDD |
| Kashdan (178)  | JAP | Daily face-to-face social interactions                                          | Social Anxiety Disorder                  | 178 | P4             | Within  | Individuals with SAD experienced weaker positive emotions and greater experiential avoidance                                      |
| Pineles (179)  | JAP | Psychophysiological reactivity and emotional responses to script driven imagery | PTSD                                     | 179 | P1, P4         | Within  | Trauma-related psychophysiological reactivity was the best predictor of PTSD diagnosis                                            |
| Sung (180)     | JAP | Two category-fluency tasks                                                      | Bipolar Illness                          | 180 | P1             | Within  | Patients with bipolar disorder produced less coherent and fewer category clusters.                                                |
| Smesny (181)   | SB  | epidermal lipid profiles                                                        | Schizophrenia                            | 181 | B5             | Within  | Differences in specific peripheral sphingolipids in cases versus controls.                                                        |
| Roberts (182)  | SB  | eye movement abnormalities during reading                                       | Schizophrenia                            | 182 | B3,B4          | Within  | Eye movement abnormalities during reading were seen in both schizophrenic patients and their first-degree relatives.              |
| Cascella (183) | SB  | Transglutaminase 6 Antibodies in Sera                                           | Schizophrenia                            | 183 | B5             | Within  | Schizophrenic patients demonstrated a higher prevalence of tTG6 antibodies.                                                       |
| Sponheim (184) | SB  | Backward masking                                                                | Schizophrenia                            | 184 | B4, P1         | Between | Patients with schizophrenia and their relatives displayed abnormalities in backward masking.                                      |
| Lungu (185)    | SB  | fMRI findings in the Cerebellum                                                 | Schizophrenia                            | 185 | B3             | Within  | A meta-analysis found frequent abnormalities with hypoactivation especially common.                                               |

|                                               |      |                                                                     |                                    |     |            |         |                                                                                                                                                          |
|-----------------------------------------------|------|---------------------------------------------------------------------|------------------------------------|-----|------------|---------|----------------------------------------------------------------------------------------------------------------------------------------------------------|
| Major Depressive Disorder Working Group (186) | MP   | Genome wide association studies                                     | Major Depression                   | 186 | B1         | Within  | This mega-analysis was unable to identify replicable molecular genetic risk variants for depression.                                                     |
| Mota (187)                                    | MP   | DRD2 and DRD4 genotypes                                             | Alcohol Dependence                 | 187 | B1         | Within  | An interaction was seen between variants in the two genes and risk for alcohol dependence.                                                               |
| Nielssen (188)                                | SP   | Migration                                                           | Psychosis                          | 188 | E3         | Within  | Those born in Oceania were at an increased risk of psychiatric hospitalization for psychotic illness.                                                    |
| Salazar (189)                                 | SP   | Types of experienced trauma                                         | PTSD                               | 189 | E1         | Within  | The types of trauma associated with the highest probability of PTSD were rape, torture, being a victim of terrorists, and molestation.                   |
| Ranta (190)                                   | SP   | Direct and relational peer victimization                            | Social Phobia (SP)                 | 190 | E1         | Within  | Direct victimization and SP have a bidirectional association among boys, while among girls relational victimization increases the risk of subsequent SP. |
| Lukaschek (191)                               | SP   | Types of experienced trauma                                         | PTSD                               | 191 | E1         | Within  | Events with an elevated risk for PTSD were: accidents, assault, war experiences, severe illness and interpersonal conflicts                              |
| Balzan (192)                                  | JNMD | Computerized versions of the "fertilizer" illusory correlation task | Schizophrenia                      | 192 | P1         | Within  | Individuals with schizophrenia were more susceptible to illusory correlations and illusions of control.                                                  |
| McGirr (193)                                  | JAD  | Wisconsin Card Sorting Task in Relatives                            | Suicide                            | 193 | B4, P1, E2 | Between | First-degree relatives of suicide completers made more perseverative errors and had a lower level of conceptual responses .                              |
| Robillard (194)                               | JAD  | Sleep phase delay detected by actigraphy                            | Unipolar and bipolar mood disorder | 194 | B5         | Within  | An elevated rate of delayed sleep phase was found for both bipolar and unipolar patients.                                                                |

|                 |     |                            |                       |     |    |        |                                                                                             |
|-----------------|-----|----------------------------|-----------------------|-----|----|--------|---------------------------------------------------------------------------------------------|
| MacMaster (195) | JAD | Corpus callosal morphology | Adolescent depression | 195 | B3 | Within | The genu of the corpus callosum area was smaller in patients with major depression.         |
| Oglesby (196)   | JAD | Intolerance of uncertainty | Hoarding Behaviors    | 196 | P3 | Within | Intolerance of uncertainty significantly predicted hoarding severity.                       |
| Lee (197)       | JAD | Genome-wide SNP matters    | Seasonal mania        | 197 | B1 | Within | Genetic variants in the NF1A gene may predispose to a seasonal pattern of bipolar disorder. |

For JAP, no fourth issue in 2013 yet available, so used third issue in 2013.

## References

- (1) Kubota M, Miyata J, Sasamoto A, Sugihara G, Yoshida H, Kawada R, et al. Thalamocortical disconnection in the orbitofrontal region associated with cortical thinning in schizophrenia. *JAMA Psychiatry* 2013 Jan;70(1):12-21.
- (2) Georgiades S, Szatmari P, Zwaigenbaum L, Bryson S, Brian J, Roberts W, et al. A prospective study of autistic-like traits in unaffected siblings of probands with autism spectrum disorder. *JAMA Psychiatry* 2013 Jan;70(1):42-8.
- (3) Suzuki K, Sugihara G, Ouchi Y, Nakamura K, Futatsubashi M, Takebayashi K, et al. Microglial activation in young adults with autism spectrum disorder. *JAMA Psychiatry* 2013 Jan;70(1):49-58.
- (4) Ecker C, Ginestet C, Feng Y, Johnston P, Lombardo MV, Lai MC, et al. Brain surface anatomy in adults with autism: the relationship between surface area, cortical thickness, and autistic symptoms. *JAMA Psychiatry* 2013 Jan;70(1):59-70.
- (5) Volk HE, Lurmann F, Penfold B, Hertz-Picciotto I, McConnell R. Traffic-related air pollution, particulate matter, and autism. *JAMA Psychiatry* 2013 Jan;70(1):71-7.
- (6) Kendler KS, Aggen SH, Patrick CJ. Familial Influences on Conduct Disorder Reflect 2 Genetic Factors and 1 Shared Environmental Factor. *JAMA Psychiatry* 2013 Jan;70(1):78-87.
- (7) Haghghi A, Schwartz DH, Abrahamowicz M, Leonard GT, Perron M, Richer L, et al. Prenatal exposure to maternal cigarette smoking, amygdala volume, and fat intake in adolescence. *JAMA Psychiatry* 2013 Jan;70(1):98-105.
- (8) Zanarini MC, Frankenburg FR, Fitzmaurice G. Defense mechanisms reported by patients with borderline personality disorder and axis II comparison subjects over 16 years of prospective follow-up: description and prediction of recovery. *Am J Psychiatry* 2013 Jan 1;170(1):111-20.
- (9) Brambilla P, Perlini C, Rajagopalan P, Saharan P, Rambaldelli G, Bellani M, et al. Schizophrenia severity, social functioning and hippocampal neuroanatomy: three-dimensional mapping study. *Br J Psychiatry* 2013 Jan;202(1):50-5.

- (10) Wojcik W, Lee W, Colman I, Hardy R, Hotopf M. Foetal origins of depression? A systematic review and meta-analysis of low birth weight and later depression. *Psychol Med* 2013 Jan;43(1):1-12.
- (11) Cents RA, Diamantopoulou S, Hudziak JJ, Jaddoe VW, Hofman A, Verhulst FC, et al. Trajectories of maternal depressive symptoms predict child problem behaviour: the Generation R study. *Psychol Med* 2013 Jan;43(1):13-25.
- (12) Rawal A, Collishaw S, Thapar A, Rice F. 'The risks of playing it safe': a prospective longitudinal study of response to reward in the adolescent offspring of depressed parents. *Psychol Med* 2013 Jan;43(1):27-38.
- (13) Sorberg A, Allebeck P, Melin B, Gunnell D, Hemmingsson T. Cognitive ability in early adulthood is associated with later suicide and suicide attempt: the role of risk factors over the life course. *Psychol Med* 2013 Jan;43(1):49-60.
- (14) Sareen J, Henriksen CA, Bolton SL, Afifi TO, Stein MB, Asmundson GJ. Adverse childhood experiences in relation to mood and anxiety disorders in a population-based sample of active military personnel. *Psychol Med* 2013 Jan;43(1):73-84.
- (15) Blair KS, Vythilingam M, Crowe SL, McCaffrey DE, Ng P, Wu CC, et al. Cognitive control of attention is differentially affected in trauma-exposed individuals with and without post-traumatic stress disorder. *Psychol Med* 2013 Jan;43(1):85-95.
- (16) Wynn JK, Jahshan C, Altshuler LL, Glahn DC, Green MF. Event-related potential examination of facial affect processing in bipolar disorder and schizophrenia. *Psychol Med* 2013 Jan;43(1):109-17.
- (17) Seidman LJ, Cherkerzian S, Goldstein JM, Agnew-Blais J, Tsuang MT, Buka SL. Neuropsychological performance and family history in children at age 7 who develop adult schizophrenia or bipolar psychosis in the New England Family Studies. *Psychol Med* 2013 Jan;43(1):119-31.
- (18) Madre M, Pomarol-Clotet E, McKenna P, Radua J, Ortiz-Gil J, Panicali F, et al. Brain functional abnormality in schizo-affective disorder: an fMRI study. *Psychol Med* 2013 Jan;43(1):143-53.

- (19) Liddle EB, Bates AT, Das D, White TP, Groom MJ, Jansen M, et al. Inefficient cerebral recruitment as a vulnerability marker for schizophrenia. *Psychol Med* 2013 Jan;43(1):169-82.
- (20) Larsson H, Asherson P, Chang Z, Ljung T, Friedrichs B, Larsson JO, et al. Genetic and environmental influences on adult attention deficit hyperactivity disorder symptoms: a large Swedish population-based study of twins. *Psychol Med* 2013 Jan;43(1):197-207.
- (21) Cho SC, Hong YC, Kim JW, Park S, Park MH, Hur J, et al. Association between urine cotinine levels, continuous performance test variables, and attention deficit hyperactivity disorder and learning disability symptoms in school-aged children. *Psychol Med* 2013 Jan;43(1):209-19.
- (22) Varghese D, Wray NR, Scott JG, Williams GM, Najman JM, McGrath JJ. The heritability of delusional-like experiences. *Acta Psychiatr Scand* 2013 Jan;127(1):48-52.
- (23) Klein DN, Glenn CR, Kosty DB, Seeley JR, Rohde P, Lewinsohn PM. Predictors of first lifetime onset of major depressive disorder in young adulthood. *J Abnorm Psychol* 2013 Feb;122(1):1-6.
- (24) Aderka IM, Haker A, Marom S, Hermesh H, Gilboa-Schechtman E. Information-seeking bias in social anxiety disorder. *J Abnorm Psychol* 2013 Feb;122(1):7-12.
- (25) Timpano KR, Schmidt NB. The relationship between self-control deficits and hoarding: a multimethod investigation across three samples. *J Abnorm Psychol* 2013 Feb;122(1):13-25.
- (26) Rodebaugh TL, Shumaker EA, Levinson CA, Fernandez KC, Langer JK, Lim MH, et al. Interpersonal constraint conferred by generalized social anxiety disorder is evident on a behavioral economics task. *J Abnorm Psychol* 2013 Feb;122(1):39-44.
- (27) Felton JW, Cole DA, Martin NC. Effects of rumination on child and adolescent depressive reactions to a natural disaster: the 2010 Nashville flood. *J Abnorm Psychol* 2013 Feb;122(1):64-73.

- (28) Wade TD, Hansell NK, Crosby RD, Bryant-Waugh R, Treasure J, Nixon R, et al. A study of changes in genetic and environmental influences on weight and shape concern across adolescence. *J Abnorm Psychol* 2013 Feb;122(1):119-30.
- (29) Klump KL, Keel PK, Racine SE, Burt SA, Neale M, Sisk CL, et al. The interactive effects of estrogen and progesterone on changes in emotional eating across the menstrual cycle. *J Abnorm Psychol* 2013 Feb;122(1):131-7.
- (30) Brook M, Kosson DS. Impaired cognitive empathy in criminal psychopathy: evidence from a laboratory measure of empathic accuracy. *J Abnorm Psychol* 2013 Feb;122(1):156-66.
- (31) Sadeh N, Javdani S, Verona E. Analysis of monoaminergic genes, childhood abuse, and dimensions of psychopathy. *J Abnorm Psychol* 2013 Feb;122(1):167-79.
- (32) Bornovalova MA, Huibregtse BM, Hicks BM, Keyes M, McGue M, Iacono W. Tests of a direct effect of childhood abuse on adult borderline personality disorder traits: a longitudinal discordant twin design. *J Abnorm Psychol* 2013 Feb;122(1):180-94.
- (33) Heritage AJ, Benning SD. Impulsivity and response modulation deficits in psychopathy: evidence from the ERN and N1. *J Abnorm Psychol* 2013 Feb;122(1):215-22.
- (34) De Sa TN, Pimenta S, Raposo V. A null effect of target's velocity in the visual representation of motion with schizophrenic patients. *J Abnorm Psychol* 2013 Feb;122(1):223-30.
- (35) Slutske WS, Cho SB, Piasecki TM, Martin NG. Genetic overlap between personality and risk for disordered gambling: evidence from a national community-based Australian twin study. *J Abnorm Psychol* 2013 Feb;122(1):250-5.
- (36) Fusar-Poli P, Meyer-Lindenberg A. Striatal presynaptic dopamine in schizophrenia, part II: meta-analysis of [(18)F]/[(11)C]-DOPA PET studies. *Schizophr Bull* 2013 Jan;39(1):33-42.
- (37) Beck AT, Grant PM, Huh GA, Perivoliotis D, Chang NA. Dysfunctional attitudes and expectancies in deficit syndrome schizophrenia. *Schizophr Bull* 2013 Jan;39(1):43-51.

- (38) Fett AK, Maat A. Social cognitive impairments and psychotic symptoms: what is the nature of their association? *Schizophr Bull* 2013 Jan;39(1):77-85.
- (39) Kantrowitz JT, Leitman DI, Lehrfeld JM, Laukka P, Juslin PN, Butler PD, et al. Reduction in tonal discriminations predicts receptive emotion processing deficits in schizophrenia and schizoaffective disorder. *Schizophr Bull* 2013 Jan;39(1):86-93.
- (40) Matthews N, Gold BJ, Sekuler R, Park S. Gesture imitation in schizophrenia. *Schizophr Bull* 2013 Jan;39(1):94-101.
- (41) Marsman A, van den Heuvel MP, Klomp DW, Kahn RS, Luijten PR, Hulshoff Pol HE. Glutamate in schizophrenia: a focused review and meta-analysis of (1)H-MRS studies. *Schizophr Bull* 2013 Jan;39(1):120-9.
- (42) Wong J, Rothmond DA, Webster MJ, Weickert CS. Increases in two truncated TrkB isoforms in the prefrontal cortex of people with schizophrenia. *Schizophr Bull* 2013 Jan;39(1):130-40.
- (43) Jessen F, Fingerhut N, Sprinkart AM, Kuhn KU, Petrovsky N, Maier W, et al. N-acetylaspartylglutamate (NAAG) and N-acetylaspartate (NAA) in patients with schizophrenia. *Schizophr Bull* 2013 Jan;39(1):197-205.
- (44) Nielsen PR, Laursen TM, Mortensen PB. Association between parental hospital-treated infection and the risk of schizophrenia in adolescence and early adulthood. *Schizophr Bull* 2013 Jan;39(1):230-7.
- (45) Coughlin JM, Ishizuka K, Kano SI, Edwards JA, Seifuddin FT, Shimano MA, et al. Marked reduction of soluble superoxide dismutase-1 (SOD1) in cerebrospinal fluid of patients with recent-onset schizophrenia. *Mol Psychiatry* 2013 Jan;18(1):10-1.
- (46) Melchior M, Chastang JF, Head J, Goldberg M, Zins M, Nabi H, et al. Socioeconomic position predicts long-term depression trajectory: a 13-year follow-up of the GAZEL cohort study. *Mol Psychiatry* 2013 Jan;18(1):112-21.
- (47) Munkholm K, Vinberg M, Vedel KL. Cytokines in bipolar disorder: a systematic review and meta-analysis. *J Affect Disord* 2013 Jan 10;144(1-2):16-27.

- (48) Zhou XD, Li L, Yan Z, Hesketh T. High sex ratio as a correlate of depression in Chinese men. *J Affect Disord* 2013 Jan 10;144(1-2):79-86.
- (49) Tomita A, Burns JK. A multilevel analysis of association between neighborhood social capital and depression: evidence from the first South African National Income Dynamics Study. *J Affect Disord* 2013 Jan 10;144(1-2):101-5.
- (50) Dudek D, Siwek M, Zielinska D, Jaeschke R, Rybakowski J. Diagnostic conversions from major depressive disorder into bipolar disorder in an outpatient setting: results of a retrospective chart review. *J Affect Disord* 2013 Jan 10;144(1-2):112-5.
- (51) Hunt IM, Bickley H, Windfuhr K, Shaw J, Appleby L, Kapur N. Suicide in recently admitted psychiatric in-patients: a case-control study. *J Affect Disord* 2013 Jan 10;144(1-2):123-8.
- (52) Niu K, Guo H, Kakizaki M, Cui Y, Ohmori-Matsuda K, Guan L, et al. A tomato-rich diet is related to depressive symptoms among an elderly population aged 70 years and over: a population-based, cross-sectional analysis. *J Affect Disord* 2013 Jan 10;144(1-2):165-70.
- (53) Shankman SA, Katz AC, Passarotti AM, Pavuluri MN. Deficits in emotion recognition in pediatric bipolar disorder: the mediating effects of irritability. *J Affect Disord* 2013 Jan 10;144(1-2):134-40.
- (54) Zhang J, Fang L, Wu YWB, Wieczorek WF. Depression, Anxiety, and Suicidal Ideation Among Chinese Americans A Study of Immigration-Related Factors. *J Nerv Ment Dis* 2013 Jan;201(1):17-22.
- (55) Gilman SE, Bruce ML, Ten HT, Alexopoulos GS, Mulsant BH, Reynolds CF, III, et al. Social inequalities in depression and suicidal ideation among older primary care patients. *Soc Psychiatry Psychiatr Epidemiol* 2013 Jan;48(1):59-69.
- (56) Pan YJ, Stewart R, Chang CK. Socioeconomic disadvantage, mental disorders and risk of 12-month suicide ideation and attempt in the National Comorbidity Survey Replication (NCS-R) in US. *Soc Psychiatry Psychiatr Epidemiol* 2013 Jan;48(1):71-9.
- (57) Jarrin I, Garcia-Fulgueiras A, Ibanez-Rojo V, Alvarez D, Garcia-Pina R, Fernandez-Liria A, et al. Absence of protective ethnic density effect on Ecuadorian migrants' mental

health in a recent migration setting: a multilevel analysis. *Soc Psychiatry Psychiatr Epidemiol* 2013 Jan;48(1):95-103.

- (58) Abas M, Tangchonlatip K, Punpuing S, Jirapramukpitak T, Darawuttimaprakorn N, Prince M, et al. Migration of children and impact on depression in older parents in rural Thailand, southeast Asia. *JAMA Psychiatry* 2013 Feb;70(2):226-34.
  
- (59) Kendler KS, Ohlsson H, Sundquist K, Sundquist J. Within-family environmental transmission of drug abuse: a Swedish national study. *JAMA Psychiatry* 2013 Feb;70(2):235-42.
  
- (60) Ramanathan S, Balasubramanian N, Krishnadas R. Macroeconomic environment during infancy as a possible risk factor for adolescent behavioral problems. *JAMA Psychiatry* 2013 Feb;70(2):218-25.
  
- (61) Wium-Andersen MK, Orsted DD, Nielsen SF, Nordestgaard BG. Elevated C-reactive protein levels, psychological distress, and depression in 73, 131 individuals. *JAMA Psychiatry* 2013 Feb;70(2):176-84.
  
- (62) Ehlers CL, Gizer IR. Evidence for a genetic component for substance dependence in Native Americans. *Am J Psychiatry* 2013 Feb 1;170(2):154-64.
  
- (63) Anglin RE, Samaan Z, Walter SD, McDonald SD. Vitamin D deficiency and depression in adults: systematic review and meta-analysis. *Br J Psychiatry* 2013 Feb;202:100-7.
  
- (64) Sellers R, Collishaw S, Rice F, Thapar AK, Potter R, Mars B, et al. Risk of psychopathology in adolescent offspring of mothers with psychopathology and recurrent depression. *Br J Psychiatry* 2013 Feb;202:108-14.
  
- (65) Matheson SL, Shepherd AM, Pinchbeck RM, Laurens KR, Carr VJ. Childhood adversity in schizophrenia: a systematic meta-analysis. *Psychol Med* 2013 Feb;43(2):225-38.
  
- (66) Khandaker GM, Zimbron J, Lewis G, Jones PB. Prenatal maternal infection, neurodevelopment and adult schizophrenia: a systematic review of population-based studies. *Psychol Med* 2013 Feb;43(2):239-57.

- (67) Sarkar S, Craig MC, Catani M, Dell'acqua F, Fahy T, Deeley Q, et al. Frontotemporal white-matter microstructural abnormalities in adolescents with conduct disorder: a diffusion tensor imaging study. *Psychol Med* 2013 Feb;43(2):401-11.
- (68) Fournier JC, Keener MT, Mullin BC, Hafeman DM, Labarbara EJ, Stiffler RS, et al. Heterogeneity of amygdala response in major depressive disorder: the impact of lifetime subthreshold mania. *Psychol Med* 2013 Feb;43(2):293-302.
- (69) Morein-Zamir S, Pappmeyer M, Gillan CM, Crockett MJ, Fineberg NA, Sahakian BJ, et al. Punishment promotes response control deficits in obsessive-compulsive disorder: evidence from a motivational go/no-go task. *Psychol Med* 2013 Feb;43(2):391-400.
- (70) Geerlings MI, Sigurdsson S, Eiriksdottir G, Garcia ME, Harris TB, Sigurdsson T, et al. Associations of current and remitted major depressive disorder with brain atrophy: the AGES-Reykjavik Study. *Psychol Med* 2013 Feb;43(2):317-28.
- (71) Lo BL, Blasi G, Taurisano P, Di GA, Ferrante F, Ursini G, et al. Interaction between catechol-O-methyltransferase (COMT) Val158Met genotype and genetic vulnerability to schizophrenia during explicit processing of aversive facial stimuli. *Psychol Med* 2013 Feb;43(2):279-92.
- (72) Breslau N, Troost JP, Bohnert K, Luo Z. Influence of predispositions on post-traumatic stress disorder: does it vary by trauma severity? *Psychol Med* 2013 Feb;43(2):381-90.
- (73) Shankman SA, Nelson BD, Sarapas C, Robison-Andrew EJ, Campbell ML, Altman SE, et al. A psychophysiological investigation of threat and reward sensitivity in individuals with panic disorder and/or major depressive disorder. *J Abnorm Psychol* 2013 May;122(2):322-38.
- (74) Pettit JW, Hartley C, Lewinsohn PM, Seeley JR, Klein DN. Is liability to recurrent major depressive disorder present before first episode onset in adolescence or acquired after the initial episode? *J Abnorm Psychol* 2013 May;122(2):353-8.
- (75) Bagge CL, Glenn CR, Lee HJ. Quantifying the impact of recent negative life events on suicide attempts. *J Abnorm Psychol* 2013 May;122(2):359-68.
- (76) Endrass T, Koehne S, Riesel A, Kathmann N. Neural correlates of feedback processing in obsessive-compulsive disorder. *J Abnorm Psychol* 2013 May;122(2):387-96.

- (77) Olatunji BO, Armstrong T, McHugo M, Zald DH. Heightened attentional capture by threat in veterans with PTSD. *J Abnorm Psychol* 2013 May;122(2):397-405.
- (78) Culbert KM, Breedlove SM, Sisk CL, Burt SA, Klump KL. The emergence of sex differences in risk for disordered eating attitudes during puberty: A role for prenatal testosterone exposure. *J Abnorm Psychol* 2013 May;122(2):420-32.
- (79) Racine SE, Keel PK, Burt SA, Sisk CL, Neale M, Boker S, et al. Exploring the relationship between negative urgency and dysregulated eating: Etiologic associations and the role of negative affect. *J Abnorm Psychol* 2013 May;122(2):433-44.
- (80) Baskin-Sommers AR, Curtin JJ, Newman JP. Emotion-modulated startle in psychopathy: Clarifying familiar effects. *J Abnorm Psychol* 2013 May;122(2):458-68.
- (81) Strauss GP, Catalano LT, Llerena K, Gold JM. The processing of emotional stimuli during periods of limited attentional resources in schizophrenia. *J Abnorm Psychol* 2013 May;122(2):492-505.
- (82) Keane BP, Silverstein SM, Wang Y, Papatomas TV. Reduced depth inversion illusions in schizophrenia are state-specific and occur for multiple object types and viewing conditions. *J Abnorm Psychol* 2013 May;122(2):506-12.
- (83) Clark CM, Gosselin F, Goghari VM. Aberrant patterns of visual facial information usage in schizophrenia. *J Abnorm Psychol* 2013 May;122(2):513-9.
- (84) Alderson RM, Hudec KL, Patros CH, Kasper LJ. Working memory deficits in adults with attention-deficit/hyperactivity disorder (ADHD): An examination of central executive and storage/rehearsal processes. *J Abnorm Psychol* 2013 May;122(2):532-41.
- (85) Petersen IT, Bates JE, D'Onofrio BM, Coyne CA, Lansford JE, Dodge KA, et al. Language ability predicts the development of behavior problems in children. *J Abnorm Psychol* 2013 May;122(2):542-57.
- (86) Bledsoe JC, Semrud-Clikeman M, Pliszka SR. Anterior cingulate cortex and symptom severity in attention-deficit/hyperactivity disorder. *J Abnorm Psychol* 2013 May;122(2):558-65.

- (87) Hashimoto L, Habita C, Beressi JP, Delepine M, Besse C, Cambon-Thomsen A, et al. Genetic mapping of a susceptibility locus for insulin-dependent diabetes mellitus on chromosome 11q. *Nature* 1994 Sep 8;371(6493):161-4.
- (88) Stefanis NC, Hatzimanolis A, Smyrnis N, Avramopoulos D, Evdokimidis I, van OJ, et al. Schizophrenia candidate gene ERBB4: covert routes of vulnerability to psychosis detected at the population level. *Schizophr Bull* 2013 Mar;39(2):349-57.
- (89) Kuhn S, Gallinat J. Resting-state brain activity in schizophrenia and major depression: a quantitative meta-analysis. *Schizophr Bull* 2013 Mar;39(2):358-65.
- (90) Chen KC, Yang YK, Howes O, Lee IH, Landau S, Yeh TL, et al. Striatal dopamine transporter availability in drug-naive patients with schizophrenia: a case-control SPECT study with [(99m)Tc]-TRODAT-1 and a meta-analysis. *Schizophr Bull* 2013 Mar;39(2):378-86.
- (91) Wong J, Duncan CE, Beveridge NJ, Webster MJ, Cairns MJ, Weickert CS. Expression of NPAS3 in the human cortex and evidence of its posttranscriptional regulation by miR-17 during development, with implications for schizophrenia. *Schizophr Bull* 2013 Mar;39(2):396-406.
- (92) Wiener H, Klei L, Calkins M, Wood J, Nimgaonkar V, Gur R, et al. Principal components of heritability from neurocognitive domains differ between families with schizophrenia and control subjects. *Schizophr Bull* 2013 Mar;39(2):464-71.
- (93) Constantino JN, Todorov A, Hilton C, Law P, Zhang Y, Molloy E, et al. Autism recurrence in half siblings: strong support for genetic mechanisms of transmission in ASD. *Mol Psychiatry* 2013 Feb;18(2):137-8.
- (94) Crowley JJ, Hilliard CE, Kim Y, Morgan MB, Lewis LR, Muzny DM, et al. Deep resequencing and association analysis of schizophrenia candidate genes. *Mol Psychiatry* 2013 Feb;18(2):138-40.
- (95) Rucker JJ, Breen G, Pinto D, Pedroso I, Lewis CM, Cohen-Woods S, et al. Genome-wide association analysis of copy number variation in recurrent depressive disorder. *Mol Psychiatry* 2013 Feb;18(2):183-9.

- (96) Gale CR, Batty GD, McIntosh AM, Porteous DJ, Deary IJ, Rasmussen F. Is bipolar disorder more common in highly intelligent people? A cohort study of a million men. *Mol Psychiatry* 2013 Feb;18(2):190-4.
- (97) Chen DT, Jiang X, Akula N, Shugart YY, Wendland JR, Steele CJ, et al. Genome-wide association study meta-analysis of European and Asian-ancestry samples identifies three novel loci associated with bipolar disorder. *Mol Psychiatry* 2013 Feb;18(2):195-205.
- (98) Fillman SG, Cloonan N, Catts VS, Miller LC, Wong J, McCrossin T, et al. Increased inflammatory markers identified in the dorsolateral prefrontal cortex of individuals with schizophrenia. *Mol Psychiatry* 2013 Feb;18(2):206-14.
- (99) Mistry M, Gillis J, Pavlidis P. Genome-wide expression profiling of schizophrenia using a large combined cohort. *Mol Psychiatry* 2013 Feb;18(2):215-25.
- (100) Lu AT, Yoon J, Geschwind DH, Cantor RM. QTL replication and targeted association highlight the nerve growth factor gene for nonverbal communication deficits in autism spectrum disorders. *Mol Psychiatry* 2013 Feb;18(2):226-35.
- (101) Christakou A, Murphy CM, Chantiluke K, Cubillo AI, Smith AB, Giampietro V, et al. Disorder-specific functional abnormalities during sustained attention in youth with Attention Deficit Hyperactivity Disorder (ADHD) and with autism. *Mol Psychiatry* 2013 Feb;18(2):236-44.
- (102) Fandino-Losada A, Wei Y, Aberg E, Sjöholm LK, Lavebratt C, Forsell Y. Influence of serotonin transporter promoter variation on the effects of separation from parent/partner on depression. *J Affect Disord* 2013 Jan 25;144(3):216-24.
- (103) Christensen H, Batterham PJ, Soubelet A, Mackinnon AJ. A test of the Interpersonal Theory of Suicide in a large community-based cohort. *J Affect Disord* 2013 Jan 25;144(3):225-34.
- (104) Hayakawa YK, Sasaki H, Takao H, Mori H, Hayashi N, Kunimatsu A, et al. Structural brain abnormalities in women with subclinical depression, as revealed by voxel-based morphometry and diffusion tensor imaging. *J Affect Disord* 2013 Jan 25;144(3):263-8.

- (105) Langas AM, Malt UF, Opjordsmoen S. Independent versus substance-induced major depressive disorders in first-admission patients with substance use disorders: an exploratory study. *J Affect Disord* 2013 Jan 25;144(3):279-83.
- (106) Peter M, Schuurmans H, Vingerhoets AJ, Smeets G, Verkoijen P, Arntz A. Borderline personality disorder and emotional intelligence. *J Nerv Ment Dis* 2013 Feb;201(2):99-104.
- (107) Schienle A, Haas-Krammer A, Schoggl H, Kapfhammer HP, Ille R. Altered state and trait disgust in borderline personality disorder. *J Nerv Ment Dis* 2013 Feb;201(2):105-8.
- (108) Kaess M, Resch F, Parzer P, von Ceumern-Lindenstjerna IA, Henze R, Brunner R. Temperamental patterns in female adolescents with borderline personality disorder. *J Nerv Ment Dis* 2013 Feb;201(2):109-15.
- (109) Krause-Utz A, Sobanski E, Alm B, Valerius G, Kleindienst N, Bohus M, et al. Impulsivity in relation to stress in patients with borderline personality disorder with and without co-occurring attention-deficit/hyperactivity disorder: an exploratory study. *J Nerv Ment Dis* 2013 Feb;201(2):116-23.
- (110) Sullivan G, Vasterling JJ, Han X, Tharp AT, Davis T, Deitch EA, et al. Preexisting mental illness and risk for developing a new disorder after hurricane Katrina. *J Nerv Ment Dis* 2013 Feb;201(2):161-6.
- (111) Pinto-Meza A, Moneta MV, Alonso J, Angermeyer MC, Bruffaerts R, Caldas de Almeida JM, et al. Social inequalities in mental health: results from the EU contribution to the World Mental Health Surveys Initiative. *Soc Psychiatry Psychiatr Epidemiol* 2013 Feb;48(2):173-81.
- (112) Luitel NP, Jordans MJ, Sapkota RP, Tol WA, Kohrt BA, Thapa SB, et al. Conflict and mental health: a cross-sectional epidemiological study in Nepal. *Soc Psychiatry Psychiatr Epidemiol* 2013 Feb;48(2):183-93.
- (113) Amstadter AB, Aggen SH, Knudsen GP, Reichborn-Kjennerud T, Kendler KS. Potentially traumatic event exposure, posttraumatic stress disorder, and Axis I and II comorbidity in a population-based study of Norwegian young adults. *Soc Psychiatry Psychiatr Epidemiol* 2013 Feb;48(2):215-23.

- (114) Winterrowd E, Canetto SS. The long-lasting impact of adolescents' deviant friends on suicidality: a 3-year follow-up perspective. *Soc Psychiatry Psychiatr Epidemiol* 2013 Feb;48(2):245-55.
- (115) Colman I, Garad Y, Zeng Y, Naicker K, Weeks M, Patten SB, et al. Stress and development of depression and heavy drinking in adulthood: moderating effects of childhood trauma. *Soc Psychiatry Psychiatr Epidemiol* 2013 Feb;48(2):265-74.
- (116) Sung TI, Chen MJ, Su HJ. A positive relationship between ambient temperature and bipolar disorder identified using a national cohort of psychiatric inpatients. *Soc Psychiatry Psychiatr Epidemiol* 2013 Feb;48(2):295-302.
- (117) MacCabe JH, Wicks S, Lofving S, David AS, Berndtsson A, Gustafsson JE, et al. Decline in cognitive performance between ages 13 and 18 years and the risk for psychosis in adulthood: a Swedish longitudinal cohort study in males. *JAMA Psychiatry* 2013 Mar;70(3):261-70.
- (118) Guha S, Rees E, Darvasi A, Ivanov D, Ikeda M, Bergen SE, et al. Implication of a rare deletion at distal 16p11.2 in schizophrenia. *JAMA Psychiatry* 2013 Mar;70(3):253-60.
- (119) Steiner J, Walter M, Glanz W, Sarnyai Z, Bernstein HG, Vielhaber S, et al. Increased prevalence of diverse N-methyl-D-aspartate glutamate receptor antibodies in patients with an initial diagnosis of schizophrenia: specific relevance of IgG NR1a antibodies for distinction from N-methyl-D-aspartate glutamate receptor encephalitis. *JAMA Psychiatry* 2013 Mar;70(3):271-8.
- (120) Croarkin PE, Nakonezny PA, Husain MM, Melton T, Buyukdura JS, Kennard BD, et al. Evidence for increased glutamatergic cortical facilitation in children and adolescents with major depressive disorder. *JAMA Psychiatry* 2013 Mar;70(3):291-9.
- (121) Chang Z, Lichtenstein P, Asherson PJ, Larsson H. Developmental twin study of attention problems: high heritabilities throughout development. *JAMA Psychiatry* 2013 Mar;70(3):311-8.
- (122) Nelson EC, Lynskey MT, Heath AC, Wray N, Agrawal A, Shand FL, et al. ANKK1, TTC12, and NCAM1 polymorphisms and heroin dependence: importance of considering drug exposure. *JAMA Psychiatry* 2013 Mar;70(3):325-33.

- (123) Baller EB, Wei SM, Kohn PD, Rubinow DR, Alarcon G, Schmidt PJ, et al. Abnormalities of dorsolateral prefrontal function in women with premenstrual dysphoric disorder: a multimodal neuroimaging study. *Am J Psychiatry* 2013 Mar 1;170(3):305-14.
- (124) White SF, Pope K, Sinclair S, Fowler KA, Brislin SJ, Williams WC, et al. Disrupted expected value and prediction error signaling in youths with disruptive behavior disorders during a passive avoidance task. *Am J Psychiatry* 2013 Mar 1;170(3):315-23.
- (125) Rai D, Zitko P, Jones K, Lynch J, Araya R. Country- and individual-level socioeconomic determinants of depression: multilevel cross-national comparison. *Br J Psychiatry* 2013 Mar;202(3):195-203.
- (126) Vrshek-Schallhorn S, Doane LD, Mineka S, Zinbarg RE, Craske MG, Adam EK. The cortisol awakening response predicts major depression: predictive stability over a 4-year follow-up and effect of depression history. *Psychol Med* 2013 Mar;43(3):483-93.
- (127) Cisler JM, James GA, Tripathi S, Mletzko T, Heim C, Hu XP, et al. Differential functional connectivity within an emotion regulation neural network among individuals resilient and susceptible to the depressogenic effects of early life stress. *Psychol Med* 2013 Mar;43(3):507-18.
- (128) Plant DT, Barker ED, Waters CS, Pawlby S, Pariante CM. Intergenerational transmission of maltreatment and psychopathology: the role of antenatal depression. *Psychol Med* 2013 Mar;43(3):519-28.
- (129) Keilp JG, Gorlyn M, Russell M, Oquendo MA, Burke AK, Harkavy-Friedman J, et al. Neuropsychological function and suicidal behavior: attention control, memory and executive dysfunction in suicide attempt. *Psychol Med* 2013 Mar;43(3):539-51.
- (130) Delvecchio G, Sugranyes G, Frangou S. Evidence of diagnostic specificity in the neural correlates of facial affect processing in bipolar disorder and schizophrenia: a meta-analysis of functional imaging studies. *Psychol Med* 2013 Mar;43(3):553-69.
- (131) Brambilla P, Perlini C, Bellani M, Tomelleri L, Ferro A, Cerruti S, et al. Increased salience of gains versus decreased associative learning differentiate bipolar disorder from schizophrenia during incentive decision making. *Psychol Med* 2013 Mar;43(3):571-80.

- (132) Ljung T, Lichtenstein P, Sandin S, D'Onofrio B, Runeson B, Langstrom N, et al. Parental schizophrenia and increased offspring suicide risk: exploring the causal hypothesis using cousin comparisons. *Psychol Med* 2013 Mar;43(3):581-90.
- (133) Dean AM, Goodby E, Ooi C, Nathan PJ, Lennox BR, Scoriels L, et al. Speed of facial affect intensity recognition as an endophenotype of first-episode psychosis and associated limbic-cortical grey matter systems. *Psychol Med* 2013 Mar;43(3):591-602.
- (134) Pinheiro AP, Del RE, Mezin J, Nestor PG, Rauber A, McCarley RW, et al. Sensory-based and higher-order operations contribute to abnormal emotional prosody processing in schizophrenia: an electrophysiological investigation. *Psychol Med* 2013 Mar;43(3):603-18.
- (135) Boydell J, Bebbington P, Bhavsar V, Kravariti E, van OJ, Murray RM, et al. Unemployment, ethnicity and psychosis. *Acta Psychiatr Scand* 2013 Mar;127(3):202-9.
- (136) Mogg K, Wilson KA, Hayward C, Cuning D, Bradley BP. Attentional biases for threat in at-risk daughters and mothers with lifetime panic disorder. *J Abnorm Psychol* 2012 Nov;121(4):852-62.
- (137) Weinberg A, Klein DN, Hajcak G. Increased error-related brain activity distinguishes generalized anxiety disorder with and without comorbid major depressive disorder. *J Abnorm Psychol* 2012 Nov;121(4):885-96.
- (138) Buu A, Wang W, Schroder SA, Kalaida NL, Puttler LI, Zucker RA. Developmental emergence of alcohol use disorder symptoms and their potential as early indicators for progression to alcohol dependence in a high risk sample: a longitudinal study from childhood to early adulthood. *J Abnorm Psychol* 2012 Nov;121(4):897-908.
- (139) Rose EJ, Donohoe G. Brain vs behavior: an effect size comparison of neuroimaging and cognitive studies of genetic risk for schizophrenia. *Schizophr Bull* 2013 May;39(3):518-26.
- (140) Lin SH, Liu CM, Hwang TJ, Hsieh MH, Hsiao PC, Faraone SV, et al. Performance on the Wisconsin Card Sorting Test in families of schizophrenia patients with different familial loadings. *Schizophr Bull* 2013 May;39(3):537-46.

- (141) Plomp G, Roinishvili M, Chkonia E, Kapanadze G, Kereselidze M, Brand A, et al. Electrophysiological evidence for ventral stream deficits in schizophrenia patients. *Schizophr Bull* 2013 May;39(3):547-54.
- (142) Lee J, Kern RS, Harvey PO, Horan WP, Kee KS, Ochsner K, et al. An intact social cognitive process in schizophrenia: situational context effects on perception of facial affect. *Schizophr Bull* 2013 May;39(3):640-7.
- (143) Zhao Q, Li T, Zhao X, Huang K, Wang T, Li Z, et al. Rare CNVs and tag SNPs at 15q11.2 are associated with schizophrenia in the Han Chinese population. *Schizophr Bull* 2013 May;39(3):712-9.
- (144) Aleksic B, Kushima I, Hashimoto R, Ohi K, Ikeda M, Yoshimi A, et al. Analysis of the VAV3 as candidate gene for schizophrenia: evidences from voxel-based morphometry and mutation screening. *Schizophr Bull* 2013 May;39(3):720-8.
- (145) Ramaekers VT, Quadros EV, Sequeira JM. Role of folate receptor autoantibodies in infantile autism. *Mol Psychiatry* 2013 Mar;18(3):270-1.
- (146) Gamazon ER, Badner JA, Cheng L, Zhang C, Zhang D, Cox NJ, et al. Enrichment of cis-regulatory gene expression SNPs and methylation quantitative trait loci among bipolar disorder susceptibility variants. *Mol Psychiatry* 2013 Mar;18(3):340-6.
- (147) Frye RE, Sequeira JM, Quadros EV, James SJ, Rossignol DA. Cerebral folate receptor autoantibodies in autism spectrum disorder. *Mol Psychiatry* 2013 Mar;18(3):369-81.
- (148) Perales J, Olaya B, Fernandez A, Alonso J, Vilagut G, Forero CG, et al. Association of childhood adversities with the first onset of mental disorders in Spain: results from the ESEMeD project. *Soc Psychiatry Psychiatr Epidemiol* 2013 Mar;48(3):371-84.
- (149) Leach LS, Butterworth P, Olesen SC, Mackinnon A. Relationship quality and levels of depression and anxiety in a large population-based survey. *Soc Psychiatry Psychiatr Epidemiol* 2013 Mar;48(3):417-25.
- (150) Yang AC, Tsai SJ, Yang CH, Shia BC, Fuh JL, Wang SJ, et al. Suicide and media reporting: a longitudinal and spatial analysis. *Soc Psychiatry Psychiatr Epidemiol* 2013 Mar;48(3):427-35.

- (151) Raudino A, Fergusson DM, Woodward LJ, Horwood LJ. The intergenerational transmission of conduct problems. *Soc Psychiatry Psychiatr Epidemiol* 2013 Mar;48(3):465-76.
- (152) Fischer-Kern M, Fonagy P, Kapusta ND, Luyten P, Boss S, Naderer A, et al. Mentalizing in female inpatients with major depressive disorder. *J Nerv Ment Dis* 2013 Mar;201(3):202-7.
- (153) Chen MH, Su TP, Chen YS, Hsu JW, Huang KL, Chang WH, et al. Allergic rhinitis in adolescence increases the risk of depression in later life: a nationwide population-based prospective cohort study. *J Affect Disord* 2013 Feb 15;145(1):49-53.
- (154) Pannekoek JN, Veer IM, van Tol MJ, van der Werff SJ, Demenescu LR, Aleman A, et al. Aberrant limbic and salience network resting-state functional connectivity in panic disorder without comorbidity. *J Affect Disord* 2013 Feb 15;145(1):29-35.
- (155) Dasgupta A, Battala M, Saggurti N, Nair S, Naik DD, Silverman JG, et al. Local social support mitigates depression among women contending with spousal violence and husband's risky drinking in Mumbai slum communities. *J Affect Disord* 2013 Feb 15;145(1):126-9.
- (156) Fisher HL, Cohen-Woods S, Hosang GM, Korszun A, Owen M, Craddock N, et al. Interaction between specific forms of childhood maltreatment and the serotonin transporter gene (5-HTT) in recurrent depressive disorder. *J Affect Disord* 2013 Feb 15;145(1):136-41.
- (157) Xu C, Mullersman JE, Wang L, Bin SB, Mao C, Posada Y, et al. Polymorphisms in seizure 6-like gene are associated with bipolar disorder I: evidence of gene x gender interaction. *J Affect Disord* 2013 Feb 15;145(1):95-9.
- (158) Cantor-Graae E, Pedersen CB. Full spectrum of psychiatric disorders related to foreign migration: a Danish population-based cohort study. *JAMA Psychiatry* 2013 Apr;70(4):427-35.
- (159) Copeland WE, Wolke D, Angold A, Costello EJ. Adult psychiatric outcomes of bullying and being bullied by peers in childhood and adolescence. *JAMA Psychiatry* 2013 Apr;70(4):419-26.

- (160) James LM, Engdahl BE, Leuthold AC, Lewis SM, Van KE, Georgopoulos AP. Neural network modulation by trauma as a marker of resilience: differences between veterans with posttraumatic stress disorder and resilient controls. *JAMA Psychiatry* 2013 Apr;70(4):410-8.
- (161) Wald I, Degnan KA, Gorodetsky E, Charney DS, Fox NA, Fruchter E, et al. Attention to threats and combat-related posttraumatic stress symptoms: prospective associations and moderation by the serotonin transporter gene. *JAMA Psychiatry* 2013 Apr;70(4):401-8.
- (162) Asami T, Whitford TJ, Bouix S, Dickey CC, Niznikiewicz M, Shenton ME, et al. Globally and locally reduced MRI gray matter volumes in neuroleptic-naive men with schizotypal personality disorder: association with negative symptoms. *JAMA Psychiatry* 2013 Apr;70(4):361-72.
- (163) Pearson RM, Fernyhough C, Bentall R, Evans J, Heron J, Joinson C, et al. Association between maternal depressogenic cognitive style during pregnancy and offspring cognitive style 18 years later. *Am J Psychiatry* 2013 Apr 1;170(4):434-41.
- (164) Kendler KS, Myers J, Damaj MI, Chen X. Early smoking onset and risk for subsequent nicotine dependence: a monozygotic co-twin control study. *Am J Psychiatry* 2013 Apr 1;170(4):408-13.
- (165) Abel KM, Dalman C, Svensson AC, Susser E, Dal H, Idring S, et al. Deviance in fetal growth and risk of autism spectrum disorder. *Am J Psychiatry* 2013 Apr 1;170(4):391-8.
- (166) Miller SC, Baktash SH, Webb TS, Whitehead CR, Maynard C, Wells TS, et al. Risk for addiction-related disorders following mild traumatic brain injury in a large cohort of active-duty U.S. airmen. *Am J Psychiatry* 2013 Apr 1;170(4):383-90.
- (167) Collip D, Myin-Germeys I, Wichers M, Jacobs N, Derom C, Thiery E, et al. FKBP5 as a possible moderator of the psychosis-inducing effects of childhood trauma. *Br J Psychiatry* 2013 Apr;202(4):261-8.
- (168) Drislane LE, Vaidyanathan U, Patrick CJ. Reduced cortical call to arms differentiates psychopathy from antisocial personality disorder. *Psychol Med* 2013 Apr;43(4):825-35.

- (169) Salum GA, Mogg K, Bradley BP, Gadelha A, Pan P, Tamanaha AC, et al. Threat bias in attention orienting: evidence of specificity in a large community-based study. *Psychol Med* 2013 Apr;43(4):733-45.
- (170) Cohen-Woods S, Craig IW, McGuffin P. The current state of play on the molecular genetics of depression. *Psychol Med* 2013 Apr;43(4):673-87.
- (171) Bar KJ, Berger S, Schwier C, Wutzler U, Beissner F. Insular dysfunction and descending pain inhibition in anorexia nervosa. *Acta Psychiatr Scand* 2013 Apr;127(4):269-78.
- (172) Sadeh N, McNeil DE. Facets of anger, childhood sexual victimization, and gender as predictors of suicide attempts by psychiatric patients after hospital discharge. *J Abnorm Psychol* 2013 Aug;122(3):879-90.
- (173) Gorman Bozorgpour EB, Klorman R, Gift TE. Effects of subtype of attention-deficit/hyperactivity disorder in adults on lateralized readiness potentials during a go/no-go choice reaction time task. *J Abnorm Psychol* 2013 Aug;122(3):868-78.
- (174) Ficks CA, Lahey BB, Waldman ID. Does low birth weight share common genetic or environmental risk with childhood disruptive disorders? *J Abnorm Psychol* 2013 Aug;122(3):842-53.
- (175) Mann CL, Footer O, Chung YS, Driscoll LL, Barch DM. Spared and impaired aspects of motivated cognitive control in schizophrenia. *J Abnorm Psychol* 2013 Aug;122(3):745-55.
- (176) Martin EA, Becker TM, Cicero DC, Kerns JG. Examination of affective and cognitive interference in schizophrenia and relation to symptoms. *J Abnorm Psychol* 2013 Aug;122(3):733-44.
- (177) Nelson BD, McGowan SK, Sarapas C, Robison-Andrew EJ, Altman SE, Campbell ML, et al. Biomarkers of threat and reward sensitivity demonstrate unique associations with risk for psychopathology. *J Abnorm Psychol* 2013 Aug;122(3):662-71.
- (178) Kashdan TB, Farmer AS, Adams LM, Ferssizidis P, McKnight PE, Nezlek JB. Distinguishing healthy adults from people with social anxiety disorder: evidence for the value of experiential avoidance and positive emotions in everyday social interactions. *J Abnorm Psychol* 2013 Aug;122(3):645-55.

- (179) Pineles SL, Suvak MK, Liverant GI, Gregor K, Wisco BE, Pitman RK, et al. Psychophysiologic reactivity, subjective distress, and their associations with PTSD diagnosis. *J Abnorm Psychol* 2013 Aug;122(3):635-44.
- (180) Sung K, Gordon B, Vannorsdall TD, Ledoux K, Schretlen DJ. Impaired retrieval of semantic information in bipolar disorder: a clustering analysis of category-fluency productions. *J Abnorm Psychol* 2013 Aug;122(3):624-34.
- (181) Smesny S, Schmelzer CE, Hinder A, Kohler A, Schneider C, Rudzok M, et al. Skin ceramide alterations in first-episode schizophrenia indicate abnormal sphingolipid metabolism. *Schizophr Bull* 2013 Jul;39(4):933-41.
- (182) Roberts EO, Proudlock FA, Martin K, Reveley MA, Al-Uzri M, Gottlob I. Reading in schizophrenic subjects and their nonsymptomatic first-degree relatives. *Schizophr Bull* 2013 Jul;39(4):896-907.
- (183) Cascella NG, Santora D, Gregory P, Kelly DL, Fasano A, Eaton WW. Increased prevalence of transglutaminase 6 antibodies in sera from schizophrenia patients. *Schizophr Bull* 2013 Jul;39(4):867-71.
- (184) Sponheim SR, Sass SM, Noukki AL, Hegeman BM. Fragile early visual percepts mark genetic liability specific to schizophrenia. *Schizophr Bull* 2013 Jul;39(4):839-47.
- (185) Lungu O, Barakat M, Laventure S, Debas K, Proulx S, Luck D, et al. The incidence and nature of cerebellar findings in schizophrenia: a quantitative review of fMRI literature. *Schizophr Bull* 2013 Jul;39(4):797-806.
- (186) Ripke S, Wray NR, Lewis CM, Hamilton SP, Weissman MM, Breen G, et al. A mega-analysis of genome-wide association studies for major depressive disorder. *Mol Psychiatry* 2013 Apr;18(4):497-511.
- (187) Mota NR, Rovaris DL, Bertuzzi GP, Contini V, Vitola ES, Grevet EH, et al. DRD2/DRD4 heteromerization may influence genetic susceptibility to alcohol dependence. *Mol Psychiatry* 2013 Apr;18(4):401-2.
- (188) Nielssen O, Sara G, Lim Y, Large M. Country of birth and hospital treatment for psychosis in New South Wales. *Soc Psychiatry Psychiatr Epidemiol* 2013 Apr;48(4):613-20.

- (189) Salazar AM, Keller TE, Gowen LK, Courtney ME. Trauma exposure and PTSD among older adolescents in foster care. *Soc Psychiatry Psychiatr Epidemiol* 2013 Apr;48(4):545-51.
- (190) Ranta K, Kaltiala-Heino R, Frojd S, Marttunen M. Peer victimization and social phobia: a follow-up study among adolescents. *Soc Psychiatry Psychiatr Epidemiol* 2013 Apr;48(4):533-44.
- (191) Lukaschek K, Kruse J, Emeny RT, Lacruz ME, von Eisenhart RA, Ladwig KH. Lifetime traumatic experiences and their impact on PTSD: a general population study. *Soc Psychiatry Psychiatr Epidemiol* 2013 Apr;48(4):525-32.
- (192) Balzan RP, Delfabbro PH, Galletly CA, Woodward TS. Illusory correlations and control across the psychosis continuum: the contribution of hypersalient evidence-hypothesis matches. *J Nerv Ment Dis* 2013 Apr;201(4):319-27.
- (193) McGirr A, Jollant F, Turecki G. Neurocognitive alterations in first degree relatives of suicide completers. *J Affect Disord* 2013 Feb 20;145(2):264-9.
- (194) Robillard R, Naismith SL, Rogers NL, Ip TK, Hermens DF, Scott EM, et al. Delayed sleep phase in young people with unipolar or bipolar affective disorders. *J Affect Disord* 2013 Feb 20;145(2):260-3.
- (195) Macmaster FP, Carrey N, Marie LL. Corpus callosal morphology in early onset adolescent depression. *J Affect Disord* 2013 Feb 20;145(2):256-9.
- (196) Oglesby ME, Medley AN, Norr AM, Capron DW, Korte KJ, Schmidt NB. Intolerance of uncertainty as a vulnerability factor for hoarding behaviors. *J Affect Disord* 2013 Feb 20;145(2):227-31.
- (197) Lee HJ, Woo HG, Greenwood TA, Kripke DF, Kelsoe JR. A genome-wide association study of seasonal pattern mania identifies NF1A as a possible susceptibility gene for bipolar disorder. *J Affect Disord* 2013 Feb 20;145(2):200-7.

### Appendix 3

I here outline three examples of potential problems with incommensurability in the field of psychiatry. First, let's take the term "depression." In lower level biological studies, the episodic clinical syndrome of major depression is typically the object of study. Subjects may be ill or they may be in remission but they have had the syndromal disorder at some point in their lives. In psychological and epidemiological studies of depression, depressive symptom scales are commonly used. These describe current depressive symptoms, typically among community residents (or undergraduate students in psychology classes) few of whom have a clinical level of dysfunction. Many studies have examined the relationship between these two concepts of "depression" (1, 2). While correlated, they are far from the same thing. This terminological muddle can make inter-level collaborative research on "depression" challenging.

Second, confusion is caused by the way the word "environment" is used in different research traditions. Genetic epidemiologists use the term to define all non-genetic factors which either make individuals brought up in the same family similar (aka "family environment") or different (aka "unique" environment). This has been called the "effective" environment (3). Most epidemiologists and developmentalists study specific "objective" features of the environment (e.g. poverty, parental behavior, stressful events). This becomes a problem because not all "objective" aspects of the environment are "effective." For example, all members of a family might be subject to the same "objective" stressor such as a flood but because of individual differences, the "effective" impact of that event might differ substantially. Furthermore, some of the "effective" environment may not be objective and instead represents the unmeasurable stochastic effects of development.

Third, the state versus trait question can bedevil cross-level research efforts. A neuropsychologist comes to a geneticist very enthusiastic about a collaborative study of anxiety. He has developed a great measure and describes the high sensitivity and specificity he has achieved in studying anxiety disorder patients. Then the geneticist asks if he has studied patients when they are well to demonstrate that he is measuring the kind of stable trait that she wants to use in her gene finding study. There is an awkward silence. "No," the neuropsychologist says, "I am interested in state changes reflecting anxiety not trait effects." The planned collaboration begins to evaporate even though they both want to study "anxiety."

## References

1. Boyd JH, Weissman MM, Thompson WD, Myers JK. Screening for depression in a community sample. Understanding the discrepancies between depression symptom and diagnostic scales. *Arch Gen Psychiatry* 1982 Oct;39(10):1195-200.
2. Foley DL, Neale MC, Kendler KS. Genetic and environmental risk factors for depression assessed by subject-rated symptom check list versus structured clinical interview. *Psychol Med* 2001 Nov;31(8):1413-23.
3. Turkheimer E, Waldron M. Nonshared environment: a theoretical, methodological, and quantitative review. *Psychol Bull* 2000 Jan;126(1):78-108.
